# Supplementary material for: Synthesis of Nonisocyanate Poly(hydroxy)urethanes from Bis(cyclic carbonates) and Polyamines
Source: MDPI journal article supplement (doi:10.3390/polym14132719), 2022-07-02

SUPPORTING INFORMATION FOR:

**Synthesis of non-isocyanate poly(hydroxy)urethanes from bis(cyclic carbonates) and polyamines.**

*Marc Martínez de Sarasa Buchaca<sup>1</sup>, Felipe de la Cruz-Martínez<sup>1</sup>, Enrique Francés-Poveda<sup>1</sup>, Juan Fernández-Baeza<sup>1</sup>, Luis F. Sánchez-Barba<sup>3</sup>, Andrés Garcés<sup>3</sup>, José A. Castro-Osma<sup>2,\*</sup>, and Agustín Lara-Sánchez<sup>1,\*</sup>*

<sup>1</sup> Universidad de Castilla-La Mancha, Departamento de Química Inorgánica, Orgánica y Bioquímica-Centro de Innovación en Química Avanzada (ORFEO-CINQA), Facultad de Ciencias y Tecnologías Químicas, 13071-Ciudad Real, Spain. E-mail: Agustin.Lara@uclm.es

<sup>2</sup> Universidad de Castilla-La Mancha, Departamento de Química Inorgánica, Orgánica y Bioquímica-Centro de Innovación en Química Avanzada (ORFEO-CINQA), Facultad de Farmacia, 02071-Albacete, Spain. E-mail: JoseAntonio.Castro@uclm.es

<sup>3</sup> Universidad Rey Juan Carlos, Departamento de Biología y Geología, Física y Química Inorgánica, 28933 Móstoles, Spain.

Correspondence: Agustin.Lara@uclm.es; JoseAntonio.Castro@uclm.es

## Table of contents

|                                                                                                        |           |
|--------------------------------------------------------------------------------------------------------|-----------|
| <b>Structural characterization of PHUs and hydroxycarbamate compounds</b>                              | <b>S3</b> |
| <b>Figure S1.</b> $^1\text{H}$ NMR spectrum of PHU <b>1a</b> in DMSO- $\text{d}_6$ .                   | S5        |
| <b>Figure S2.</b> $\text{C}^{13}\{^1\text{H}\}$ NMR spectrum of PHU <b>1a</b> in DMSO- $\text{d}_6$ .  | S5        |
| <b>Figure S3.</b> IR spectrum of PHU <b>1a</b> .                                                       | S6        |
| <b>Figure S4.</b> DSC thermogram of PHU <b>1a</b> .                                                    | S6        |
| <b>Figure S5.</b> TGA thermogram of PHU <b>1a</b> .                                                    | S7        |
| <b>Figure S6.</b> $^1\text{H}$ NMR spectrum of PHU <b>1b</b> in DMSO- $\text{d}_6$ .                   | S7        |
| <b>Figure S7.</b> $\text{C}^{13}\{^1\text{H}\}$ NMR spectrum of PHU <b>1b</b> in DMSO- $\text{d}_6$ .  | S8        |
| <b>Figure S8.</b> IR spectrum of PHU <b>1b</b> .                                                       | S8        |
| <b>Figure S9.</b> MALDI-ToF spectrum of PHU <b>1b</b> .                                                | S9        |
| <b>Figure S10.</b> DSC thermogram of PHU <b>1b</b> .                                                   | S9        |
| <b>Figure S11.</b> TGA thermogram of PHU <b>1b</b> .                                                   | S10       |
| <b>Figure S12.</b> $^1\text{H}$ NMR spectrum of PHU <b>1c</b> in DMSO- $\text{d}_6$ .                  | S10       |
| <b>Figure S13.</b> $\text{C}^{13}\{^1\text{H}\}$ NMR spectrum of PHU <b>1c</b> in DMSO- $\text{d}_6$ . | S11       |
| <b>Figure S14.</b> IR spectrum of PHU <b>1c</b> .                                                      | S11       |
| <b>Figure S15.</b> DSC thermogram of PHU <b>1c</b> .                                                   | S12       |
| <b>Figure S16.</b> TGA thermogram of PHU <b>1c</b> .                                                   | S12       |
| <b>Figure S17.</b> $^1\text{H}$ NMR spectrum of PHU <b>1d</b> in DMSO- $\text{d}_6$ .                  | S13       |
| <b>Figure S18.</b> $\text{C}^{13}\{^1\text{H}\}$ NMR spectrum of PHU <b>1d</b> in DMSO- $\text{d}_6$ . | S13       |
| <b>Figure S19.</b> IR spectrum of PHU <b>1d</b> .                                                      | S14       |
| <b>Figure S20.</b> GPC trace of PHU <b>1d</b> .                                                        | S14       |
| <b>Figure S21.</b> DSC thermogram of PHU <b>1d</b> .                                                   | S15       |
| <b>Figure S22.</b> TGA thermogram of PHU <b>1d</b> .                                                   | S15       |
| <b>Figure S23.</b> $^1\text{H}$ NMR spectrum of PHU <b>1e</b> in DMSO- $\text{d}_6$ .                  | S16       |
| <b>Figure S24.</b> $\text{C}^{13}\{^1\text{H}\}$ NMR spectrum of PHU <b>1e</b> in DMSO- $\text{d}_6$ . | S16       |
| <b>Figure S25.</b> IR spectrum of PHU <b>1e</b> .                                                      | S17       |
| <b>Figure S26.</b> DSC thermogram of PHU <b>1e</b> .                                                   | S17       |
| <b>Figure S27.</b> TGA thermogram of PHU <b>1e</b> .                                                   | S18       |
| <b>Figure S28.</b> IR spectrum of PHU <b>1e</b> crosslinked.                                           | S18       |
| <b>Figure S29.</b> DSC thermogram of PHU <b>1e</b> crosslinked.                                        | S19       |

|                                                                                                                    |     |
|--------------------------------------------------------------------------------------------------------------------|-----|
| <b>Figure S30.</b> TGA thermogram of PHU <b>1e</b> crosslinked.                                                    | S19 |
| <b>Figure S31.</b> $^1\text{H}$ NMR spectrum of PHU <b>1f</b> in DMSO- $\text{d}_6$ .                              | S20 |
| <b>Figure S32.</b> $\text{C}^{13}\{^1\text{H}\}$ NMR spectrum of PHU <b>1f</b> in DMSO- $\text{d}_6$ .             | S20 |
| <b>Figure S33.</b> IR spectrum of PHU <b>1f</b> .                                                                  | S21 |
| <b>Figure S34.</b> GPC trace of PHU <b>1f</b> .                                                                    | S21 |
| <b>Figure S35.</b> DOSY spectrum of PHU <b>1f</b> .                                                                | S22 |
| <b>Figure S36.</b> DSC thermogram of PHU <b>1f</b> .                                                               | S22 |
| <b>Figure S37.</b> TGA thermogram of PHU <b>1f</b> .                                                               | S23 |
| <b>Figure S38.</b> $^1\text{H}$ NMR spectrum of hydroxycarbamate <b>2</b> in DMSO- $\text{d}_6$ .                  | S23 |
| <b>Figure S39.</b> $\text{C}^{13}\{^1\text{H}\}$ NMR spectrum of hydroxycarbamate <b>2</b> in DMSO- $\text{d}_6$ . | S24 |
| <b>Figure S40.</b> IR spectrum of hydroxycarbamate <b>2</b> .                                                      | S24 |
| <b>Figure S41.</b> MALDI-ToF spectrum of hydroxycarbamate <b>2</b> .                                               | S25 |
| <b>Figure S42.</b> $^1\text{H}$ NMR spectrum of hydroxycarbamate <b>3</b> in DMSO- $\text{d}_6$ .                  | S25 |
| <b>Figure S43.</b> $\text{C}^{13}\{^1\text{H}\}$ NMR spectrum of hydroxycarbamate <b>3</b> in DMSO- $\text{d}_6$ . | S26 |
| <b>Figure S44.</b> IR spectrum of hydroxycarbamate <b>3</b> .                                                      | S26 |
| <b>Figure S45.</b> MALDI-ToF spectrum of hydroxycarbamate <b>3</b> .                                               | S27 |

## Structural characterization of PHUs and hydroxycarbamates

**PHU 1a:**  $^1\text{H}$ -NMR (500 MHz, DMSO- $d_6$ ): 7.11 (d,  $J_{\text{HH}} = 5.7\text{ Hz}$ , 1H,  $\text{NH}_{\text{urethane}}$ ), 4.89 (d,  $J_{\text{HH}} = 5.1\text{ Hz}$ , 1H, *secondary OH*), 4.75 (t,  $J_{\text{HH}} = 5.5\text{ Hz}$ , 1H, *primary OH*), 4.67 (m, 1H), 3.89 (m, 2H), 3.73 (dd,  $J_{\text{HH}} = 10.4, 5.2\text{ Hz}$ , 1H), 3.46 (m, 2H), 3.39 (m, 4H,  $\text{CH}_2^{\alpha}\text{BGDC}$ ), 3.33 (m, 4H), 2.96 (s, 4H,  $\text{CH}_2^{\alpha}\text{BDA}$ ), 1.51 (s, 4H,  $\text{CH}_2^{\beta}\text{BGDC}$ ), 1.37 (s, 4H,  $\text{CH}_2^{\beta}\text{BDA}$ ).  $^{13}\text{C}$ -NMR (500 MHz, DMSO- $d_6$ ): 156.7 ( $\text{C}=\text{O}_{\text{urethane}}$ ), 73.6, 72.4, 70.9 ( $\text{C}^{\alpha}\text{BGDC}$ ), 69.7, 68.3, 66, 60.6, 40.4 ( $\text{C}^{\alpha}\text{BDA}$ ), 27.2 ( $\text{C}^{\beta}\text{BDA}$ ), 26.4 ( $\text{C}^{\beta}\text{BGDC}$ ). IR:  $\nu(\text{C}=\text{O})_{\text{amide}} = 1699\text{ cm}^{-1}$ ;  $\nu(\text{NH})_{\text{amide}} = 1533\text{ cm}^{-1}$ ,  $\nu(\text{C}-\text{O})_{\text{urethane}} = 1252\text{ cm}^{-1}$ .

**PHU 1b:**  $^1\text{H}$ -NMR (400 MHz, DMSO- $d_6$ ): 7.11 (s, 1H,  $\text{NH}_{\text{urethane}}$ ), 4.90 (s, 1H, *OH*), 4.67 (s, 1H), 3.88 (m, 2H), 3.74 (s, 2H), 3.57 (s, 1H,  $\text{CH}_2^{\alpha}\text{-NH}_{\text{isophorone}}$ ), 3.46 (s, 2H), 3.39 (s, 2H,  $\text{CH}_2^{\alpha}\text{BGDC}$ ), 3.32 (s, 2H), 2.72 (d,  $J_{\text{H-H}} = 5.7\text{ Hz}$ , 2H,  $\text{CH}^{\beta}\text{-NH}_{\text{isophorone}}$ ), 1.52 (s, 2H,  $\text{CH}_2^{\beta}\text{BGDC}$ ), 0.93 (m, 11H,  $\text{CH}_3$ ,  $\text{CH}_2$  isophorone).  $^{13}\text{C}$ -NMR (400 MHz, DMSO- $d_6$ ): 157 ( $\text{C}=\text{O}_{\text{urethane}}$ ), 73.7, 72.4, 70.9 ( $\text{C}^{\alpha}\text{BGDC}$ ), 69.7, 68.3, 66, 60.6, 55 ( $\text{C}^{\eta}\text{-NH}_{\text{isophorone}}$ ), 47.4 ( $\text{C}_{\text{isophorone}}$ ), 43.9 ( $\text{C}^{\alpha}\text{-NH}_{\text{isophorone}}$ ), 35.5 ( $\text{C}_{\text{isophorone}}$ ), 28.4 ( $\text{C}_{\text{isophorone}}$ ), 26.4 ( $\text{C}^{\beta}\text{BGDC}$ ), 23.7 ( $\text{C}_{\text{isophorone}}$ ). IR:  $\nu(\text{C}=\text{O})_{\text{amide}} = 1695\text{ cm}^{-1}$ ;  $\nu(\text{NH})_{\text{amide}} = 1537\text{ cm}^{-1}$ ,  $\nu(\text{C}-\text{O})_{\text{urethane}} = 1243\text{ cm}^{-1}$ .

**PHU 1c:**  $^1\text{H}$ -NMR (500 MHz, DMSO- $d_6$ ): 7.11 (s, 1H,  $\text{NH}_{\text{urethane}}$ ), 4.89 (s, 1H, *secondary OH*), 4.75 (s, 1H, *primary OH*), 4.67 (m, 1H), 3.88 (ddd,  $J_{\text{HH}} = 15.2, 10.9, 6\text{ Hz}$ ), 3.73 (m, 2H), 3.46 (s, 2H), 3.39 (s, 2H,  $\text{CH}_2^{\alpha}\text{BGDC}$ ), 3.32 (s, 2H), 2.95 (d,  $J_{\text{HH}} = 5.1\text{ Hz}$ , 1H), 2.80 (d,  $J_{\text{HH}} = 3.6\text{ Hz}$ , 4H,  $\text{CH}^{\sigma}\text{-NH}_{\text{diamine}}$ ), 1.67 (d,  $J_{\text{HH}} = 12.9\text{ Hz}$ , 2H), 1.51 (d,  $J_{\text{HH}} = 5.9\text{ Hz}$ , 4H,  $\text{CH}_2^{\beta}\text{BGDC}$ ), 1.37 (s, 2H,  $\text{CH}_2^{\beta}\text{-NH}_{\text{diamine}}$ ), 1.27 (dd,  $J_{\text{HH}} = 13, 8.1\text{ Hz}$ , 1H), 1.13 (m, 1H), 0.73 (m, 1H), 0.47 (q,  $J_{\text{HH}} = 12.2\text{ Hz}$ , 1H).  $^{13}\text{C}$ -NMR (500 MHz, DMSO- $d_6$ ): 156.9 ( $\text{C}=\text{O}_{\text{urethane}}$ ), 73.5, 72.4, 70.9 ( $\text{C}^{\alpha}\text{BGDC}$ ), 69.7, 68.3, 66, 60.6, 47.3 ( $\text{C}^{\alpha}\text{-NH}_{\text{diamine}}$ ), 38 ( $\text{C}^{\beta}\text{-NH}_{\text{diamine}}$ ), 30.8 ( $\text{C}_{\text{diamine}}$ ), 26.4 ( $\text{C}^{\beta}\text{BGDC}$ ). IR:  $\nu(\text{C}=\text{O})_{\text{amide}} = 1695\text{ cm}^{-1}$ ;  $\nu(\text{NH})_{\text{amide}} = 1538\text{ cm}^{-1}$ ,  $\nu(\text{C}-\text{O})_{\text{urethane}} = 1251\text{ cm}^{-1}$ .

**PHU 1d:**  $^1\text{H}$ -NMR (400 MHz, DMSO- $d_6$ ): 7.67 (s, 1H,  $\text{NH}_{\text{urethane}}$ ), 7.26 (t,  $J_{\text{HH}} = 7.7\text{ Hz}$ , 1H,  $\text{Ph}_{\text{m-xylylene}}$ ), 7.13 (d,  $J_{\text{HH}} = 7.2\text{ Hz}$ , 3H,  $\text{Ph}_{\alpha\text{-xylylene}}$ ), 4.92 (s, 1H, *secondary OH*), 4.78 (s, 1H, *primary OH*), 4.72 (m, 1H), 4.16 (d,  $J_{\text{HH}} = 5.8\text{ Hz}$ , 2H,  $\text{CH}_2^{\alpha}\text{-NH}_{\text{m-xylylene}}$ ), 3.93 (ddd,  $J_{\text{HH}} = 17.2, 11, 5.3\text{ Hz}$ , 2H), 3.76 (s, 1H), 3.48 (s, 2H), 3.39 (s, 2H,  $\text{CH}_2^{\alpha}\text{BGDC}$ ), 3.34 (s, 2H), 1.52 (s, 4H,  $\text{CH}_2^{\beta}\text{BGDC}$ ).  $^{13}\text{C}$ -NMR (500 MHz, DMSO- $d_6$ ): 157 ( $\text{C}=\text{O}_{\text{urethane}}$ ), 140.3 ( $\text{Ph}_{\text{m-xylylene}}$ ), 128.7 ( $\text{Ph}_{\text{m-xylylene}}$ ), 126.7 ( $\text{Ph}_{\text{m-xylylene}}$ ), 126 ( $\text{Ph}_{\text{m-xylylene}}$ ), 73.9, 72.4, 70.9 ( $\text{C}^{\alpha}\text{BGDC}$ ), 69.7, 68.3, 66.2, 60.6, 44.3 ( $\text{C}^{\alpha}\text{-NH}_{\text{m-xylylene}}$ ), 26.4 ( $\text{C}^{\beta}\text{BGDC}$ ). IR:  $\nu(\text{C}=\text{O})_{\text{amide}} = 1695\text{ cm}^{-1}$ ;  $\nu(\text{NH})_{\text{amide}} = 1533\text{ cm}^{-1}$ ,  $\nu(\text{C}-\text{O})_{\text{urethane}} = 1247\text{ cm}^{-1}$ .

**PHU 1e:**  $^1\text{H}$ -NMR (500 MHz, DMSO- $d_6$ ): 7.15 (s, 1H,  $\text{NH}_{\text{urethane}}$ ), 4.68 (dt,  $J_{\text{H-H}} = 10; 4.9\text{ Hz}$ , 1H), 3.90 (ddd,  $J_{\text{HH}} = 17.8, 10, 7\text{ Hz}$ , 2H), 3.75 (m, 1H), 3.46 (s, 2H), 3.39 (s, 2H,  $\text{CH}_2^{\alpha}\text{BGDC}$ ), 3.32 (d,  $J_{\text{HH}} = 5.4\text{ Hz}$ , 2H), 3.01 (d,  $J_{\text{HH}} = 5.6\text{ Hz}$ , 4H,  $\text{CH}_2^{\alpha}\text{-NH}_{\text{urethane}}$ ), 2.55 (m, 2H,  $\text{CH}_2^{\alpha}\text{-NH}_{\text{triamine}}$ ), 2.45 (m, 4H,  $\text{CH}_2^{\beta}\text{-NH}_{\text{urethane}}$ ), 2.38 (dd,  $J_{\text{HH}} = 13.1, 6.7\text{ Hz}$ , 2H,  $\text{CH}_2^{\beta}\text{-NH}_{\text{triamine}}$ ), 1.52 (m, 2H,  $\text{CH}_2^{\beta}\text{BGDC}$ ).  $^{13}\text{C}$ -NMR (500 MHz, DMSO- $d_6$ ): 156.9 ( $\text{C}=\text{O}_{\text{urethane}}$ ), 73.9, 72.4, 70.9 ( $\text{C}^{\alpha}\text{BGDC}$ ), 69.7, 68.2, 66.2, 60.6, 58.4

( $C^\beta$ -NH<sub>urethane</sub>), 54.4 ( $C^\beta$ -NH<sub>triamine</sub>), 40 ( $C^\alpha$ -NH<sub>triamine</sub>), 39.5( $CH_2^\alpha$ -NH<sub>urethane</sub>), 26.4 ( $C^\beta$ BGDC). IR:  $\nu$  (C=O)<sub>amide</sub> = 1696 cm<sup>-1</sup>;  $\nu$  (NH)<sub>amide</sub> = 1532 cm<sup>-1</sup>,  $\nu$  (C-O)<sub>urethane</sub> = 1251 cm<sup>-1</sup>.

**PHU 1f:** <sup>1</sup>H-NMR (500 MHz, DMSO-d<sub>6</sub>): 7.13 (s, 1H, NH<sub>urethane</sub>), 6.21 (s, 1H, NH<sub>urea</sub>), 4.65 (s, 1H), 3.86 (m, 2H), 3.82 (m, 1H,  $CH^\alpha$ -NH<sub>L-lysine</sub>), 3.75 (m, 1H), 3.46 (s, 2H), 3.39 (s, 2H,  $CH_2^\alpha$ BGDC), 3.32 (d,  $J_{HH}$  = 5.4Hz, 2H), 3.26-3.320 (m, 8H, DBU), 2.91 (d,  $J_{HH}$  = 5.4 Hz, 4H,  $CH_2^\alpha$ -NH<sub>L-lysine</sub>), 2.61 (d,  $J_{HH}$  = 5.4 Hz, 2H, DBU), 1.85 (m, 2H, DBU), 1.64-1.60 (m, 4H, DBU), 1.51 (s, 2H,  $CH_2^\beta$ BGDC), 1.32 (m, 4H,  $CH_2^\beta$ -NH<sub>L-lysine</sub>), 1.19 (s, 2H,  $CH_2^\delta$ -NH<sub>L-lysine</sub>). <sup>13</sup>C-NMR (500 MHz, DMSO-d<sub>6</sub>): 174.1(C=O<sub>L-lysine</sub>), 164.7 (DBU), 156.7 (C=O<sub>urethane</sub>), 155.8 (C=O<sub>urea</sub>), 73.9, 72.4, 70.9 ( $C^\alpha$ BGDC), 69.7, 68.2, 66.0, 60.6, 56.0 ( $C^\alpha$ -NH<sub>L-lysine</sub>), 53.4 (DBU), 48.22 (DBU), 40.9 ( $C^\alpha$ -NH<sub>L-lysine</sub>), 32.9 ( $C^\beta$ -NH<sub>L-lysine</sub>), 32.7 (DBU), 30.0 ( $C^\beta$ -NH<sub>L-lysine</sub>), 27.0(DBU), 26.4 ( $C^\gamma$ BGDC), 24.5 (DBU), 22.8 ( $C^\gamma$ -NH<sub>L-lysine</sub>), 20.2 (DBU). IR:  $\nu$  (C=O)<sub>amide</sub> = 1697 cm<sup>-1</sup>;  $\nu$  (C=O)<sub>urea</sub> = 1646 cm<sup>-1</sup>,  $\nu$  (NH)<sub>amide</sub> = 1537 cm<sup>-1</sup>,  $\nu$  (C-O)<sub>urethane</sub> = 1245 cm<sup>-1</sup>.

**Hydroxycarbamate 2:** <sup>1</sup>H-NMR (400 MHz, DMSO-d<sub>6</sub>): 7.11 (d,  $J_{H-H}$  = 5.5Hz, 1H, NH<sub>urethane</sub>), 4.94 (m, 2H, CH<sub>cyclic carbonate</sub>), 4.75 (t,  $J_{H-H}$  = 5.5 Hz, 1H, *primary OH*), 4.67 (m, 1H), 4.52 (t,  $J_{HH}$  = 8.4Hz, 2H,  $CH_2$ <sub>cyclic carbonate</sub>), 4.25 (dd,  $J_{HH}$  = 8.2, 5.9Hz, 2H,  $CH_2$ <sub>cyclic carbonate</sub>), 4.09 (q,  $J_{HH}$  = 5.2 Hz, 1H, *secondary OH*), 3.89 (dd,  $J_{HH}$  = 27.1, 5.3Hz, 2H), 3.74 (m, 1H), 3.59 (ddd,  $J_{HH}$  = 15.6, 11.5, 3.4Hz, 4H), 3.46 (m, 2H), 3.39 (m, 4H,  $CH_2^\sigma$ BGDC), 3.33 (m, 2H), 2.95 (s, 4H,  $CH_2^\alpha$ BDA), 1.53 (s, 4H,  $CH_2^\beta$ BGDC), 1.37 (s, 4H,  $CH_2^\gamma$ BDA). <sup>13</sup>C-NMR (400 MHz, DMSO-d<sub>6</sub>): 156.7 (C=O<sub>urethane</sub>), 155.4 (C=O<sub>cyclic carbonate</sub>), 76.0 (CH<sub>cyclic carbonate</sub>), 73.6, 72.4, 71.0, 70.9 ( $C^\sigma$ BGDC), 70.0, 68.3, 66.6 (CH<sub>2</sub><sub>cyclic carbonate</sub>), 66.0, 60.6, 40.4 ( $C^\alpha$ BDA), 27.2 ( $CH_2^\beta$ BDA), 26.1 ( $CH_2^\beta$ BGDC). IR:  $\nu$  (C=O)<sub>cyclic carbonate</sub> = 1787 cm<sup>-1</sup>,  $\nu$  (C=O)<sub>amide</sub> = 1692 cm<sup>-1</sup>;  $\nu$  (NH)<sub>amide</sub> = 1525 cm<sup>-1</sup>,  $\nu$  (C-O)<sub>urethane</sub> = 1249, 1049 cm<sup>-1</sup>.

Analysis found: C: 50.5 % H: 7.5 % N: 3.9 %

Calculated: C: 50.3 % H: 7.2 % N: 4.2 %

**Hydroxycarbamate 3:** <sup>1</sup>H-NMR (400 MHz, DMSO-d<sub>6</sub>): 7.11 (s, 1H, NH<sub>urethane</sub>), 4.68 (m, 1H), 3.88 (ddd,  $J_{HH}$  = 17.1, 11, 5.4Hz, 4H, 2), 3.73 (m, 1H), 3.46 (m, 2H, 11), 3.39 (m, 4H,  $CH_2^\alpha$ BGDC), 3.32 (m, 4H), 2.95 (dd,  $J_{HH}$  = 12.6, 6.5Hz, 4H,  $CH_2^\alpha$ BDA), 2.5 (m, 4H,  $CH_2^\alpha$ BDA<sub>urethane</sub>), 1.51 (d,  $J_{HH}$  = 4.6Hz, 4H,  $CH_2^\beta$ BGDC), 1.35 (m, 4H,  $CH_2^\beta$ BDA<sub>BDA urethane</sub> 3). <sup>13</sup>C-NMR (400 MHz, DMSO-d<sub>6</sub>): 156.7 (C=O<sub>urethane</sub>), 73.5, 72.4, 70.9 ( $C^\alpha$ BGDC), 69.7, 68.3, 66.0, 60.6, 41.9 ( $C^\alpha$ BDA<sub>urethane</sub>), 40.4 ( $C^\alpha$ BDA), 31.1 ( $C^\beta$ BDA<sub>urethane</sub>) 27.5 ( $C^\beta$ BDA), 26.4 ( $C^\beta$ BGDC). IR:  $\nu$  (O-H) = 3340 cm<sup>-1</sup>,  $\nu$  (C=O)<sub>amide</sub> = 1687 cm<sup>-1</sup>;  $\nu$  (NH)<sub>amide</sub> = 1535 cm<sup>-1</sup>,  $\nu$  (C-O)<sub>urethane</sub> = 1248, 1109 cm<sup>-1</sup>.

Analysis found: C: 52.7 % H: 9.5 % N: 11.4 %

Calculated: C: 52.5 % H: 9.2 % N: 11.7 %

**Figure S1.**  $^1\text{H}$ -NMR spectrum of PHU **1a** in  $\text{DMSO-d}_6$ .

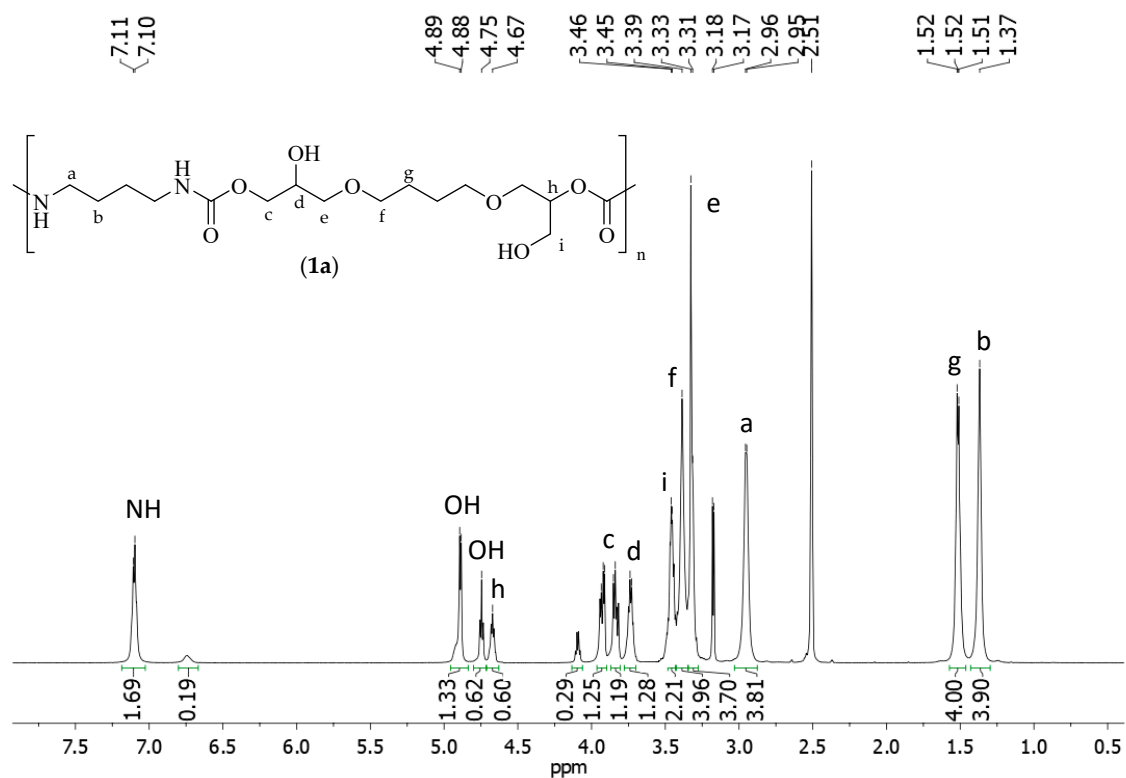

**Figure S2.**  $^{13}\text{C}$ - $\{^1\text{H}\}$ -NMR spectrum of PHU **1a** in  $\text{DMSO-d}_6$ .

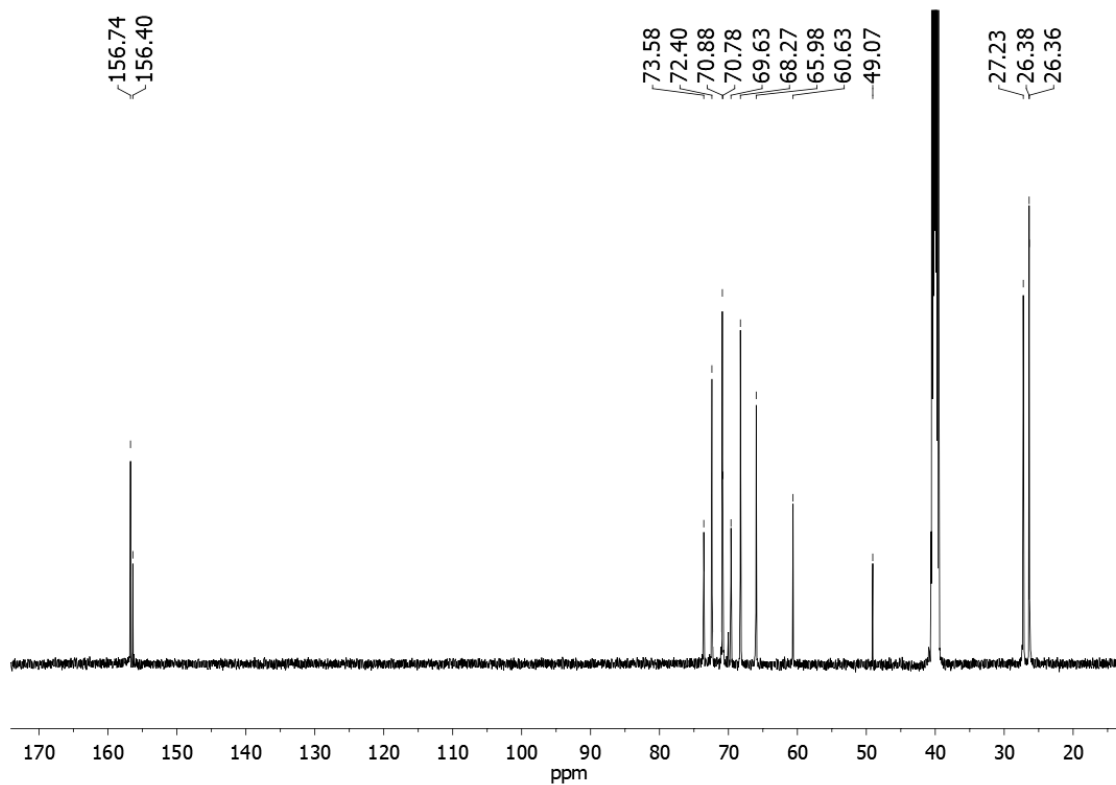

**Figure S3.** IR spectrum of PHU **1a**.

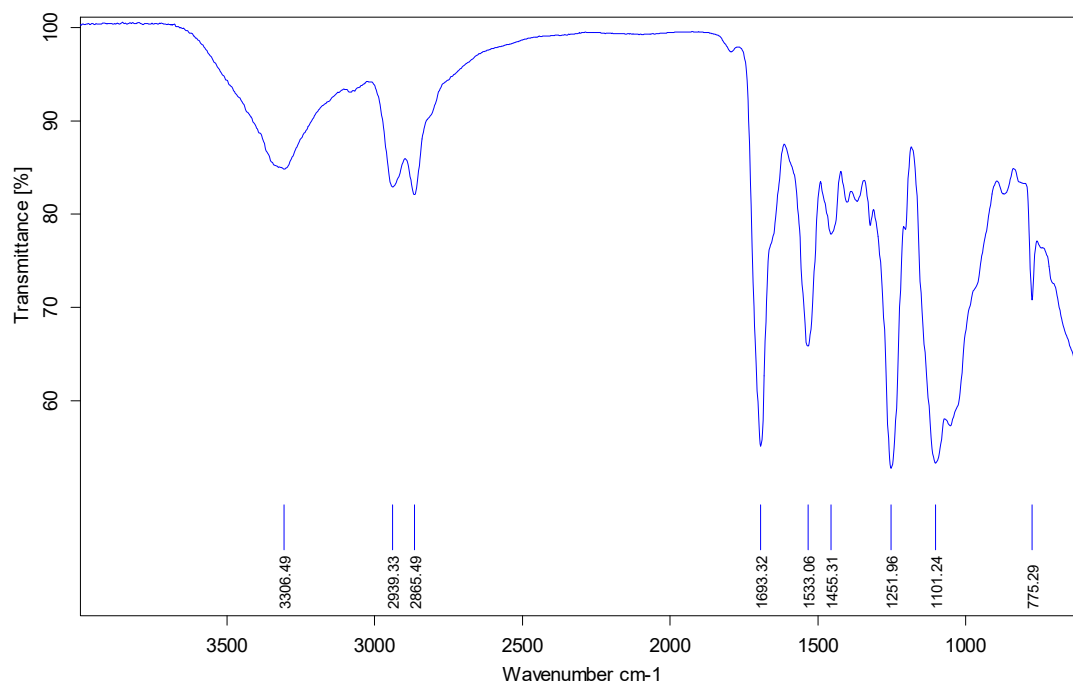

**Figure S4.** DSC thermogram of PHU **1a**.

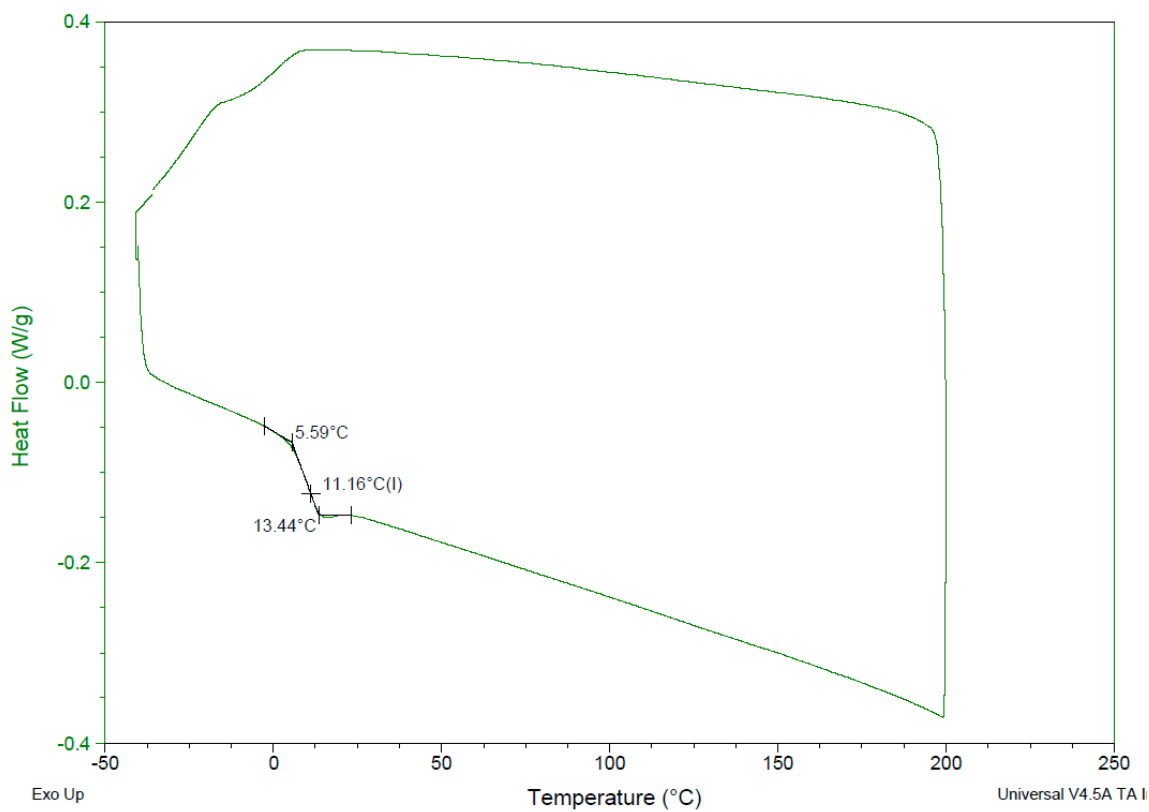

**Figure S5.** TGA thermogram of PHU **1a**.

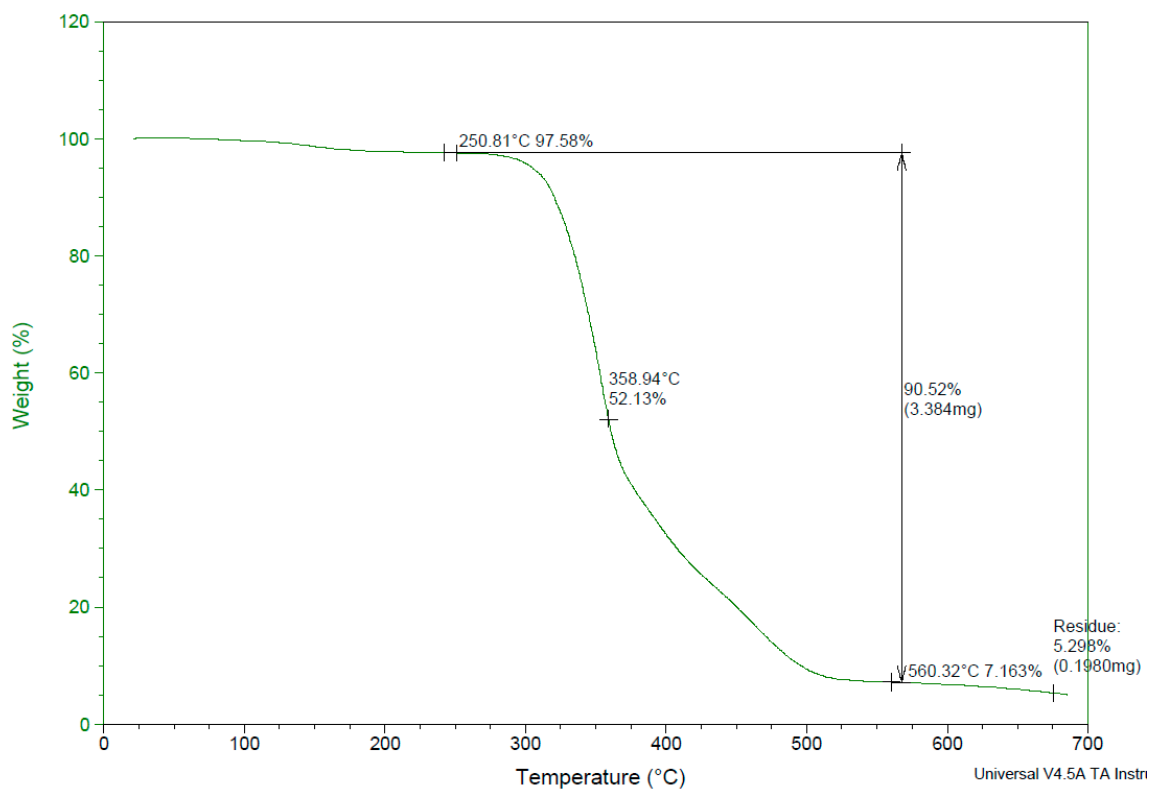

**Figure S6.**  $^1\text{H}$ -NMR spectrum of PHU **1b** in  $\text{DMSO-d}_6$ .

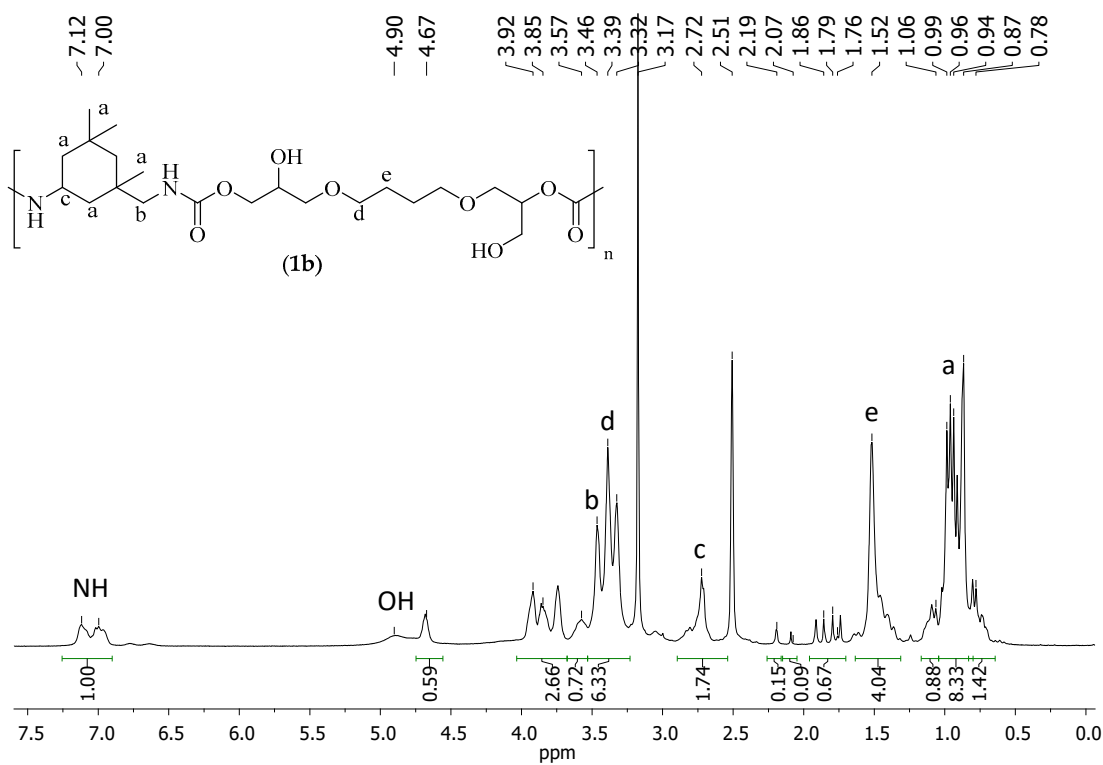



**Figure S7.**  $^{13}\text{C}$ - $\{^1\text{H}\}$ -NMR spectrum of PHU **1b** in  $\text{DMSO-d}_6$ .

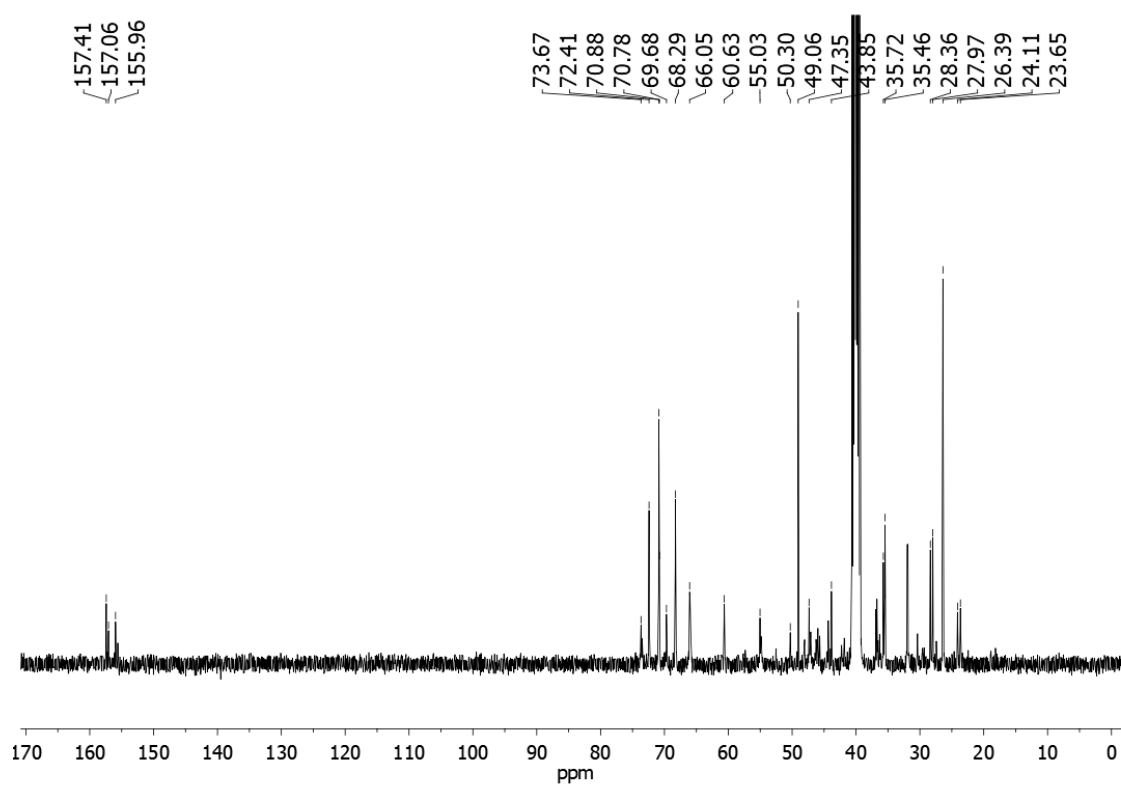

**Figure S8.** IR spectrum of PHU **1b**.

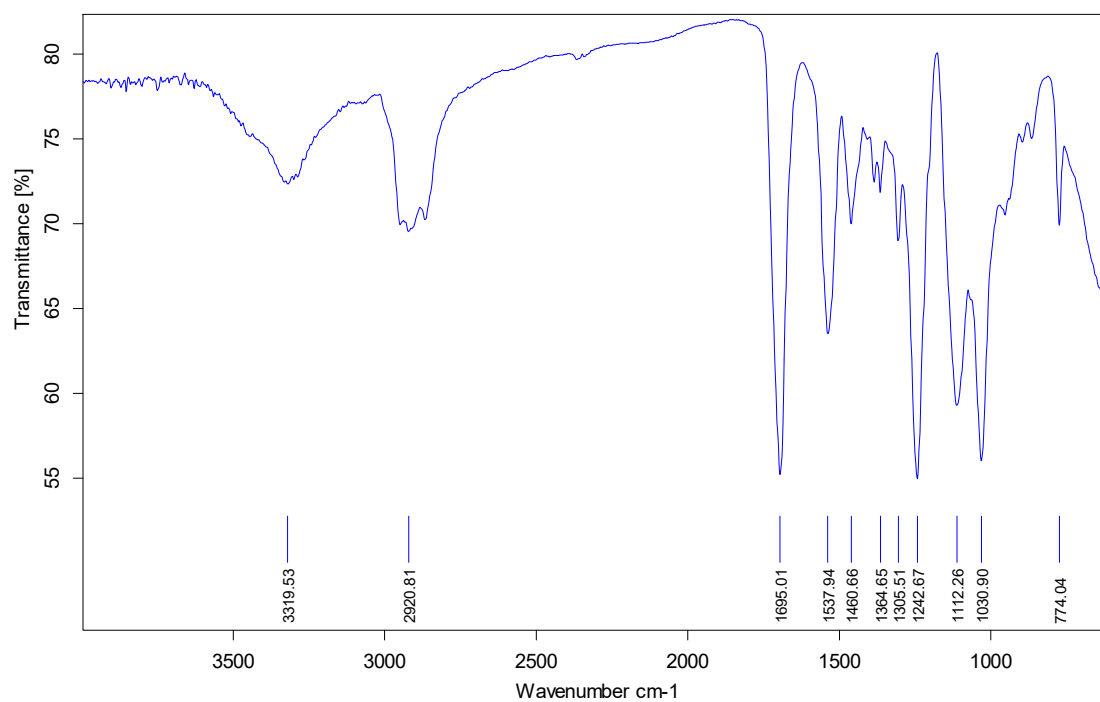

**Figure S9.** MALDI-ToF spectrum of PHU **1b**.

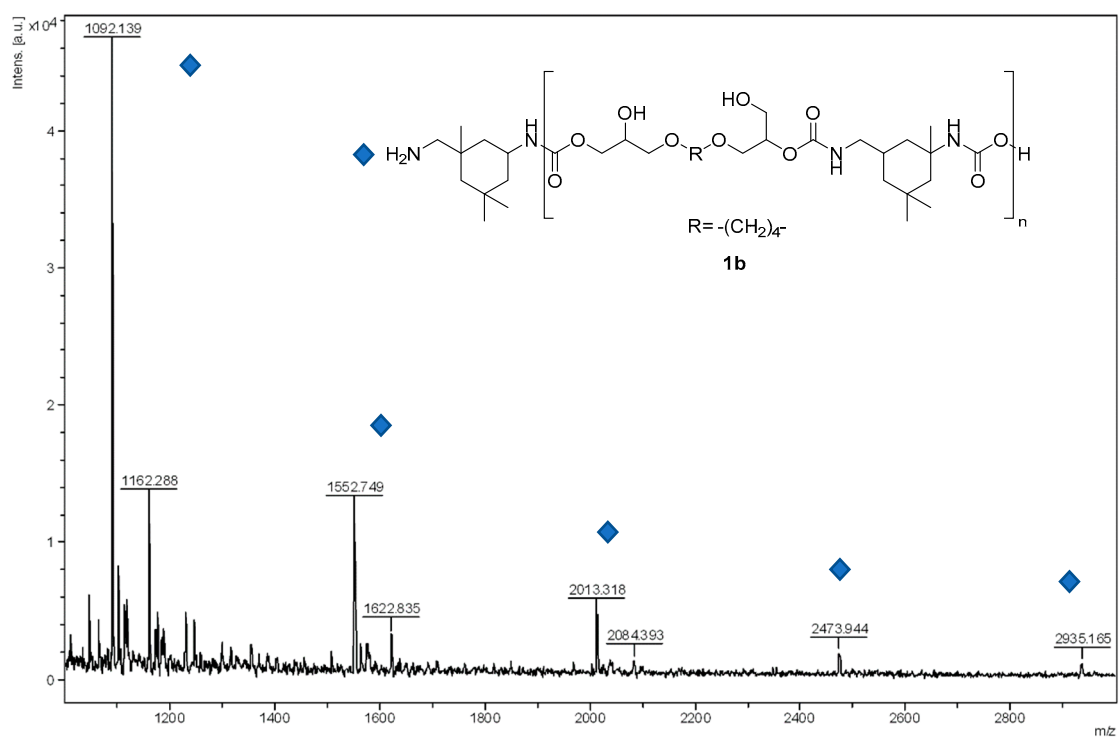

**Figure S10.** DSC thermogram of PHU **1b**.

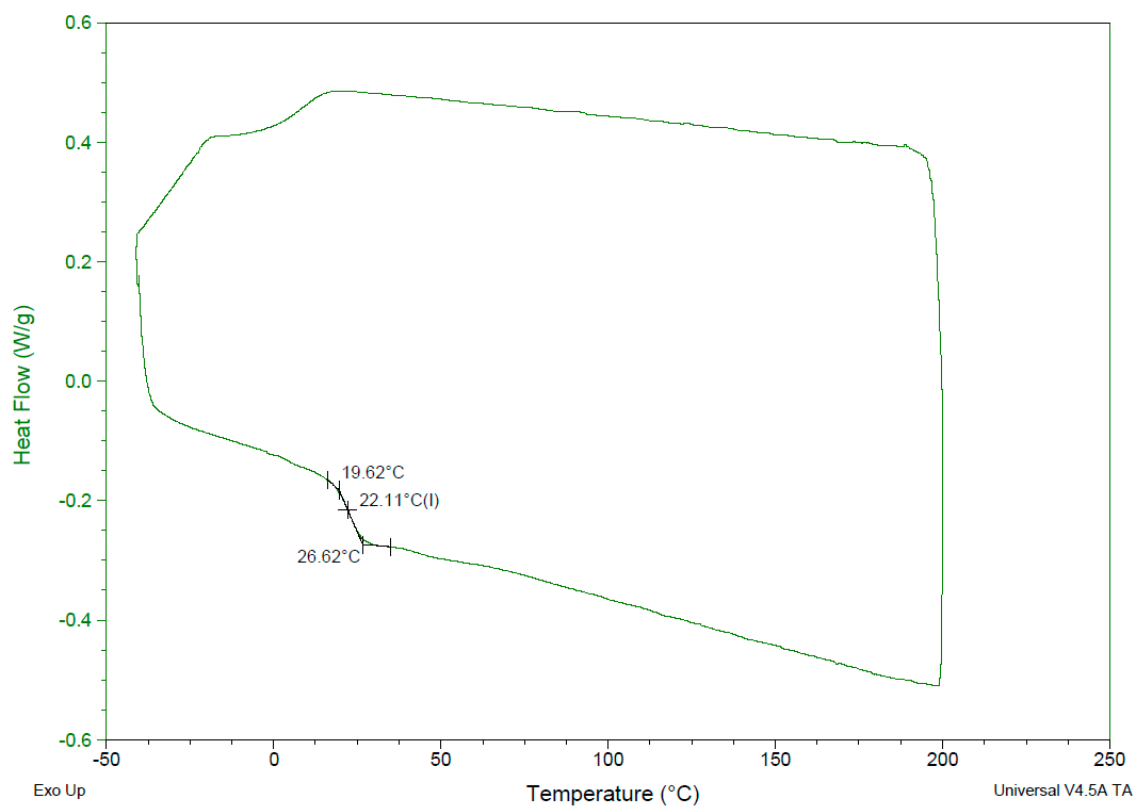

**Figure S11.** TGA thermogram of PHU **1b**.

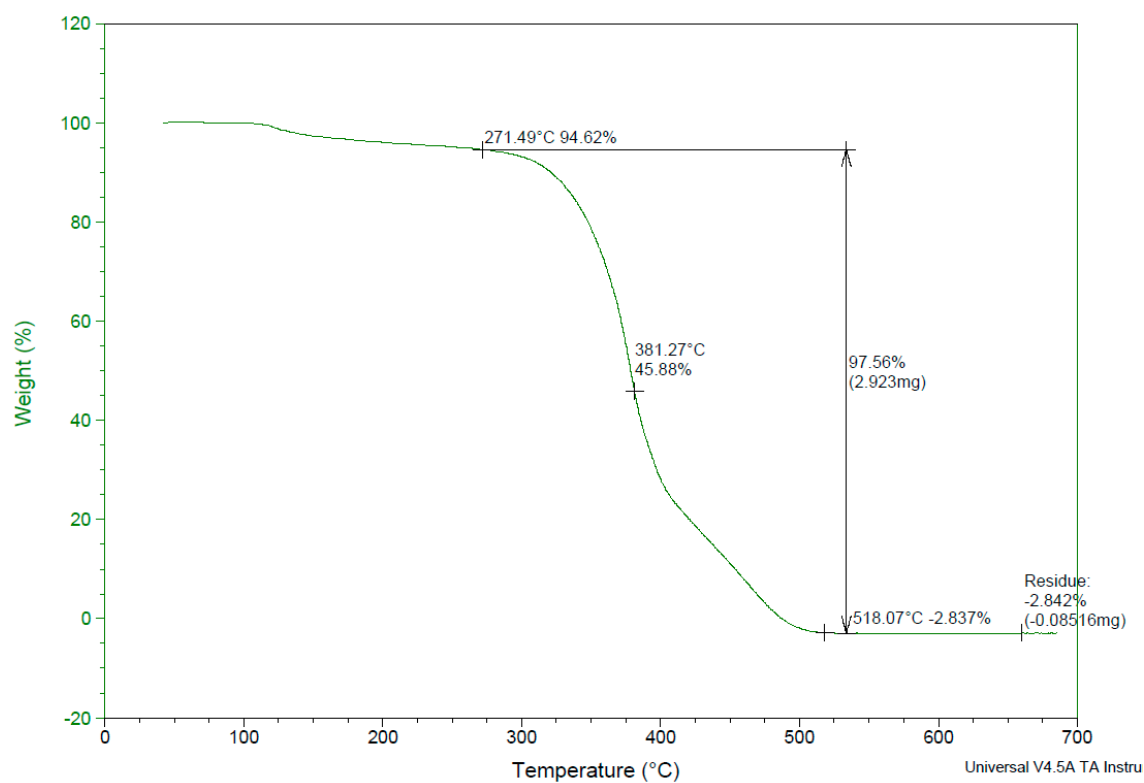

**Figure S12.**  $^1\text{H}$ -NMR spectrum of PHU **1c** in  $\text{DMSO-d}_6$ .

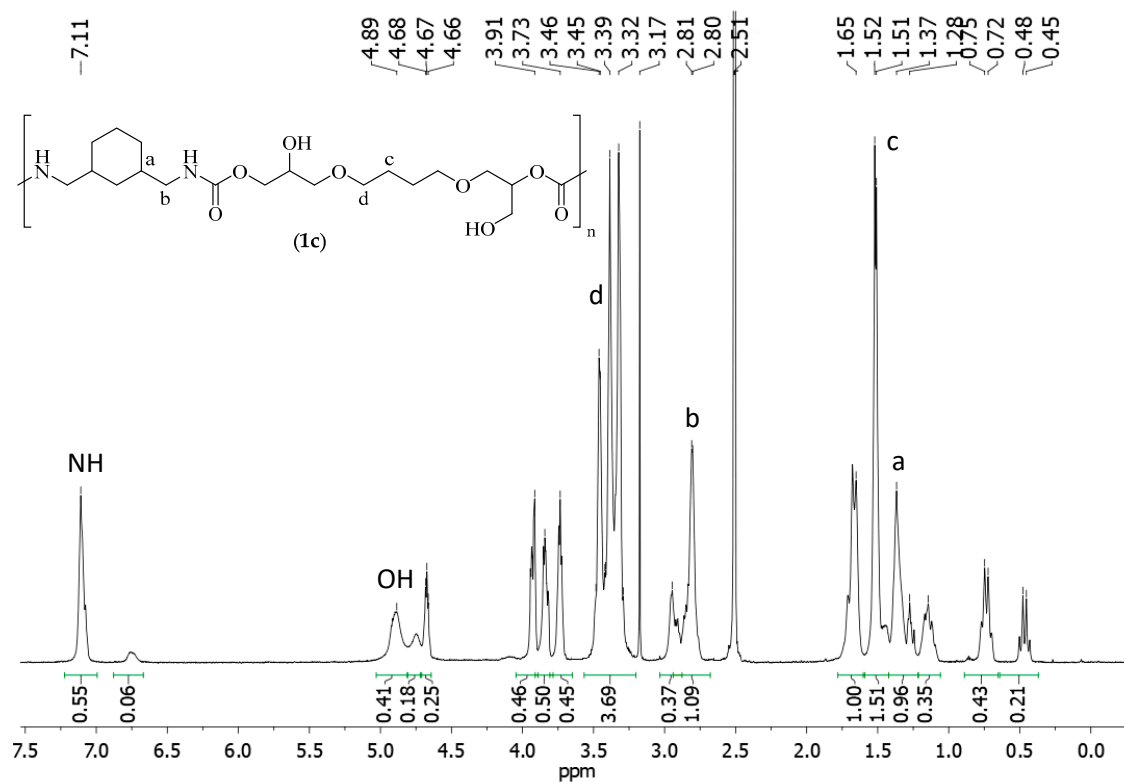

**Figure S13.**  $^{13}\text{C}$ - $\{^1\text{H}\}$ -NMR spectrum of PHU **1c** in  $\text{DMSO-d}_6$ .

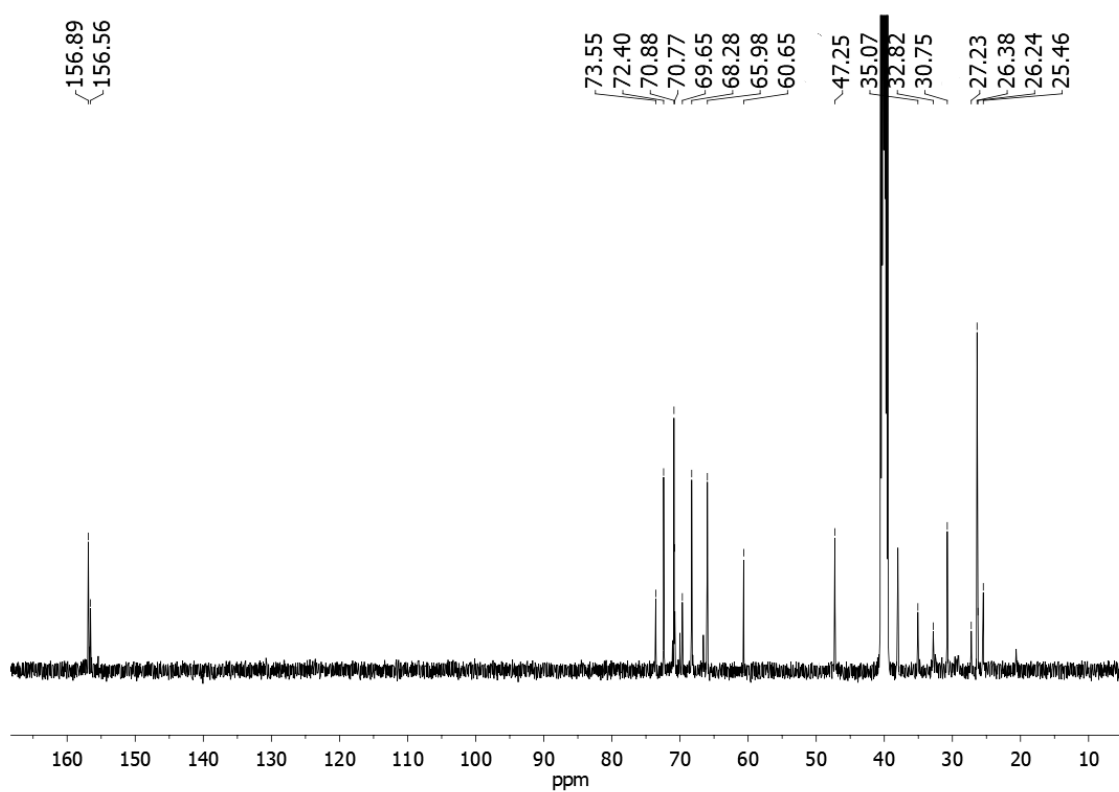

**Figure S14.** IR spectrum of PHU **1c**.

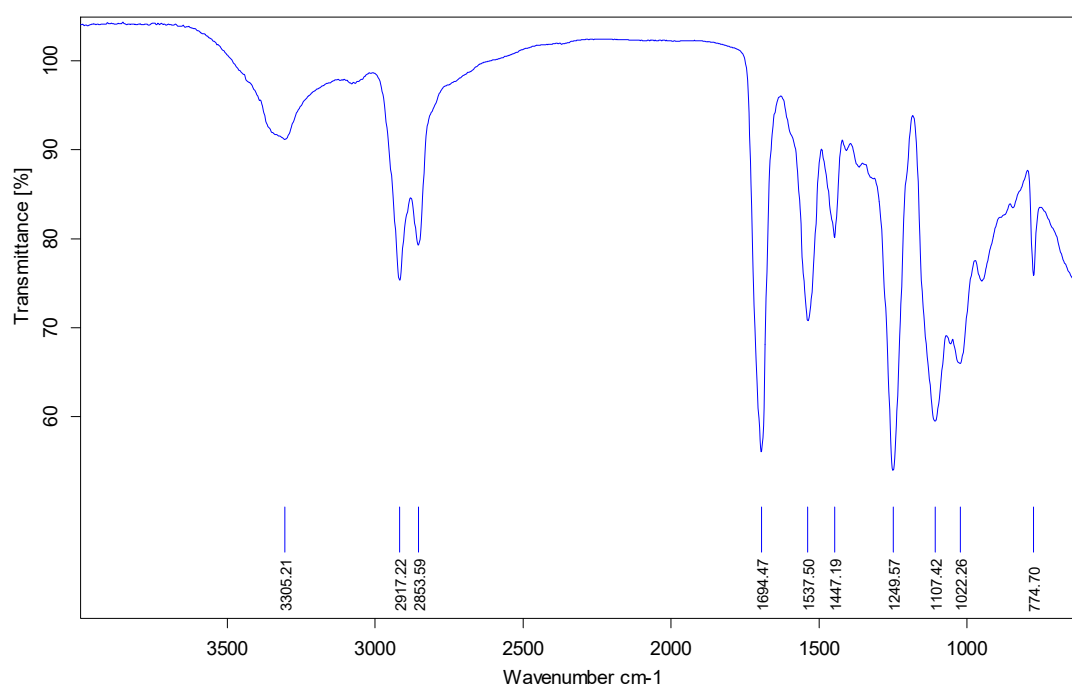

**Figure S15.** DSC thermogram of PHU **1c**.

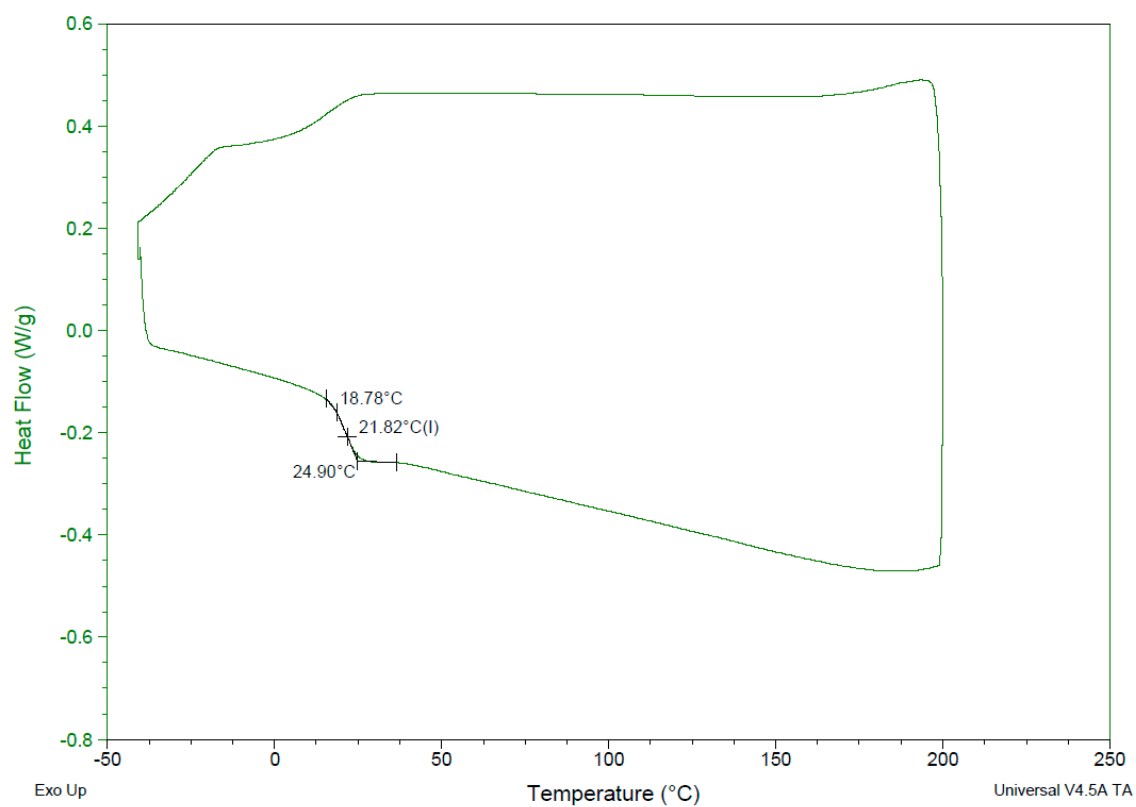

**Figure S16.** TGA thermogram of PHU **1c**.

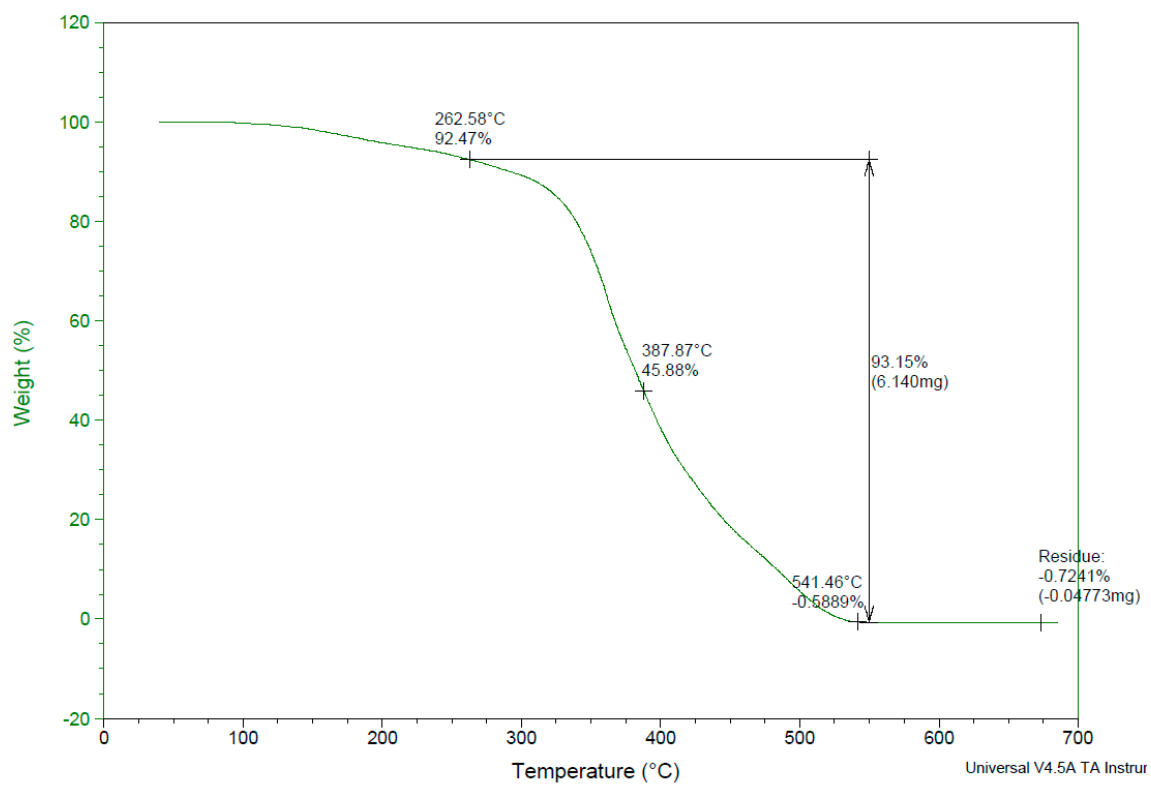

**Figure S17.**  $^1\text{H}$ -NMR spectrum of PHU **1d** in  $\text{DMSO-d}_6$ .

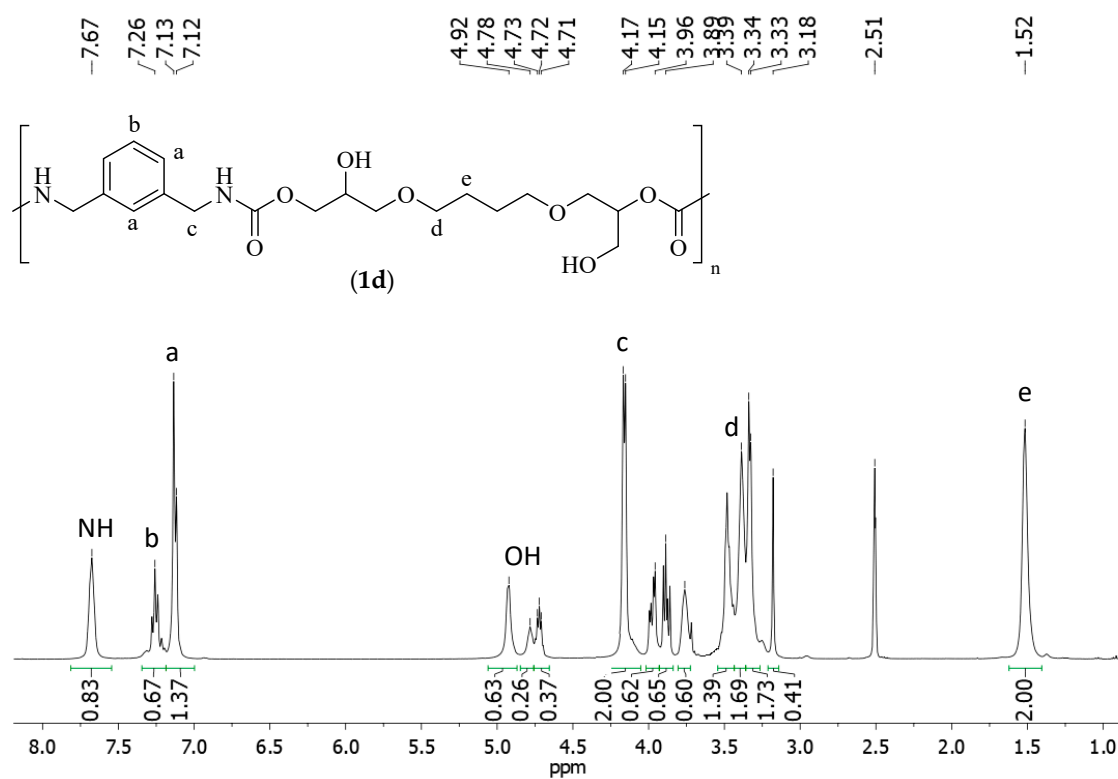

**Figure S18.**  $^{13}\text{C}$ - $\{^1\text{H}\}$ -NMR spectrum of PHU **1d** in  $\text{DMSO-d}_6$ .

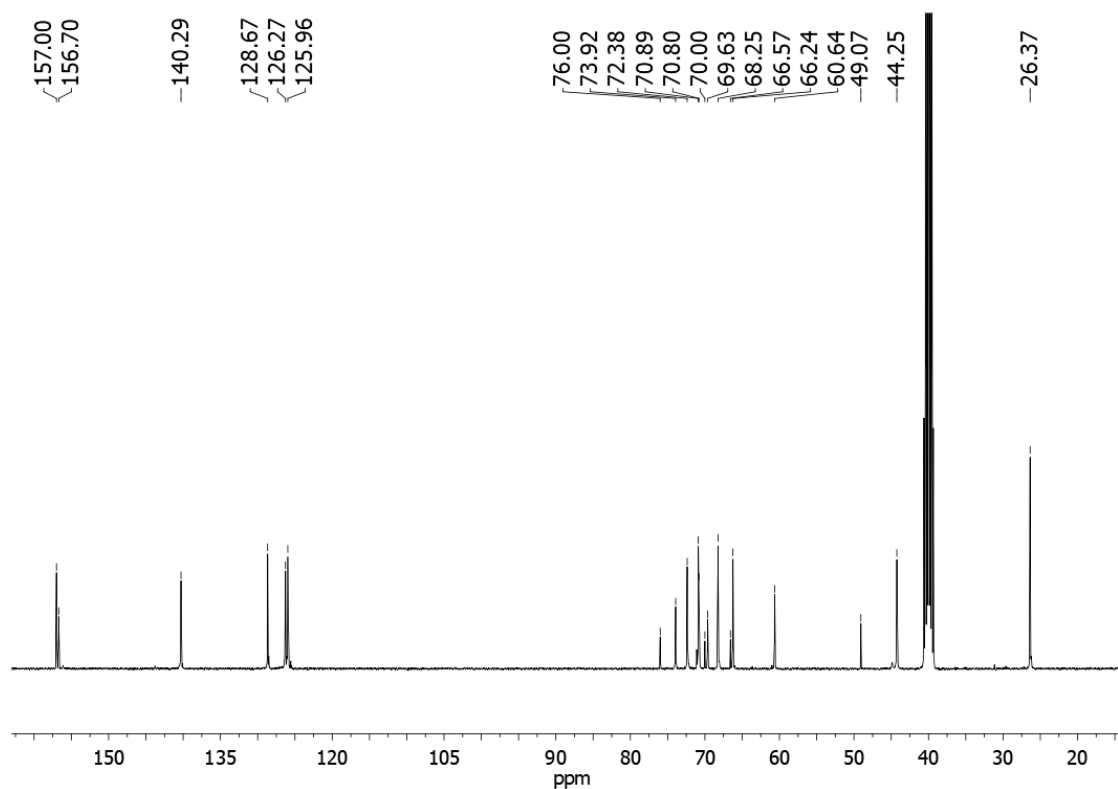

**Figure S19.** IR spectrum of PHU **1d**.

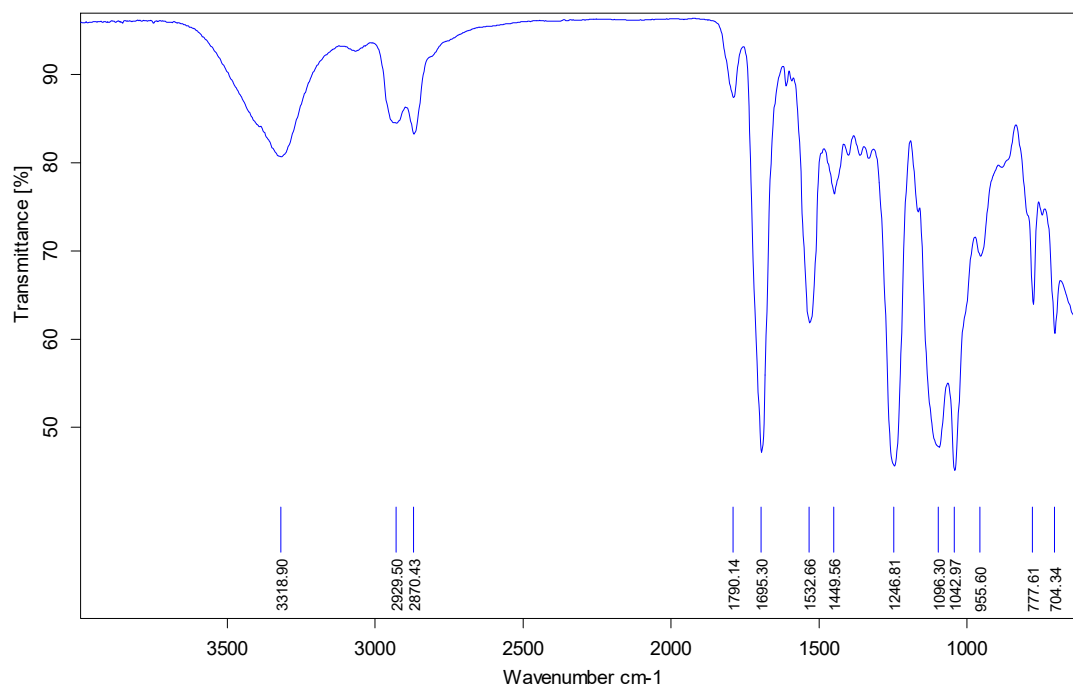

**Figure S20.** GPC trace of PHU **1d**.

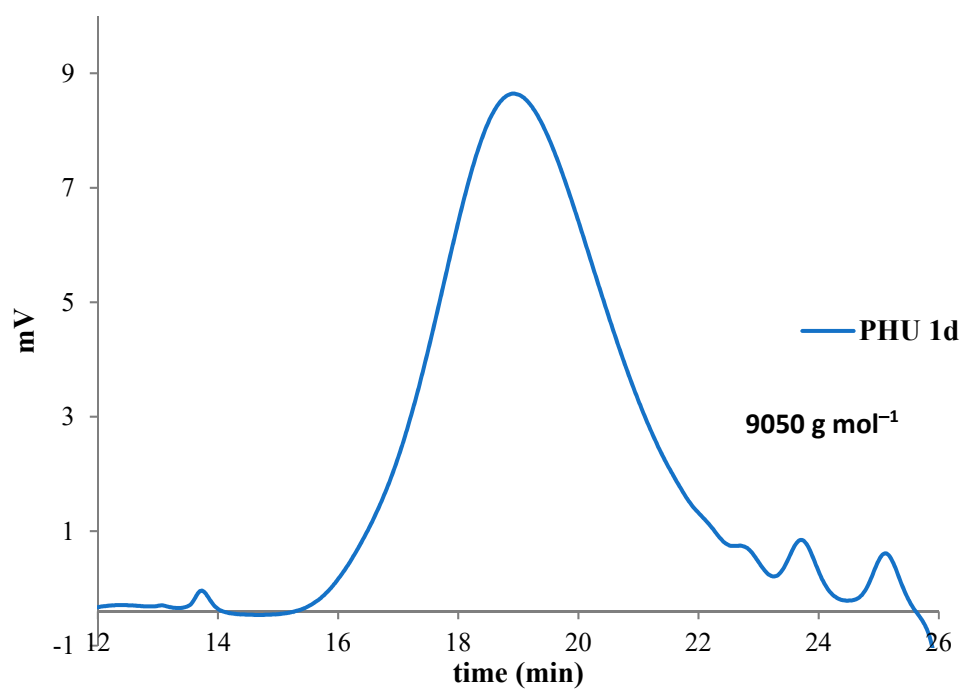

**Figure S21.** DSC thermogram of PHU **1d**.

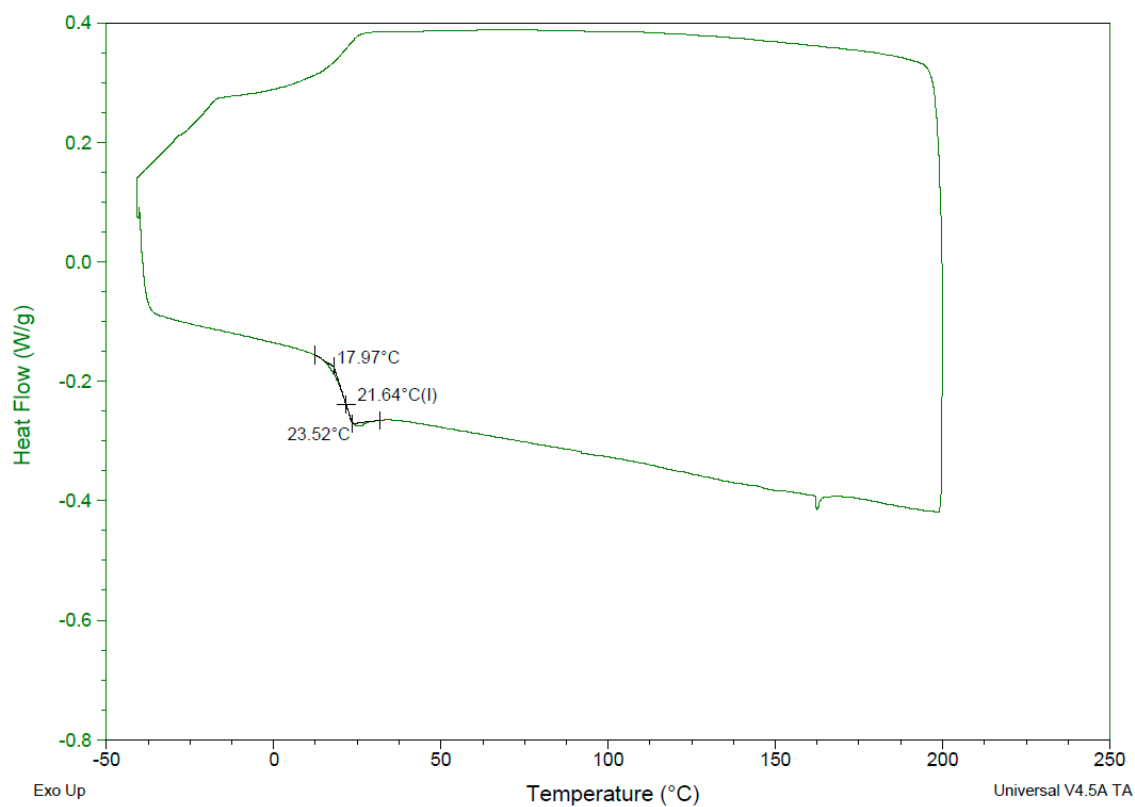

**Figure S22.** TGA thermogram of PHU **1d**.

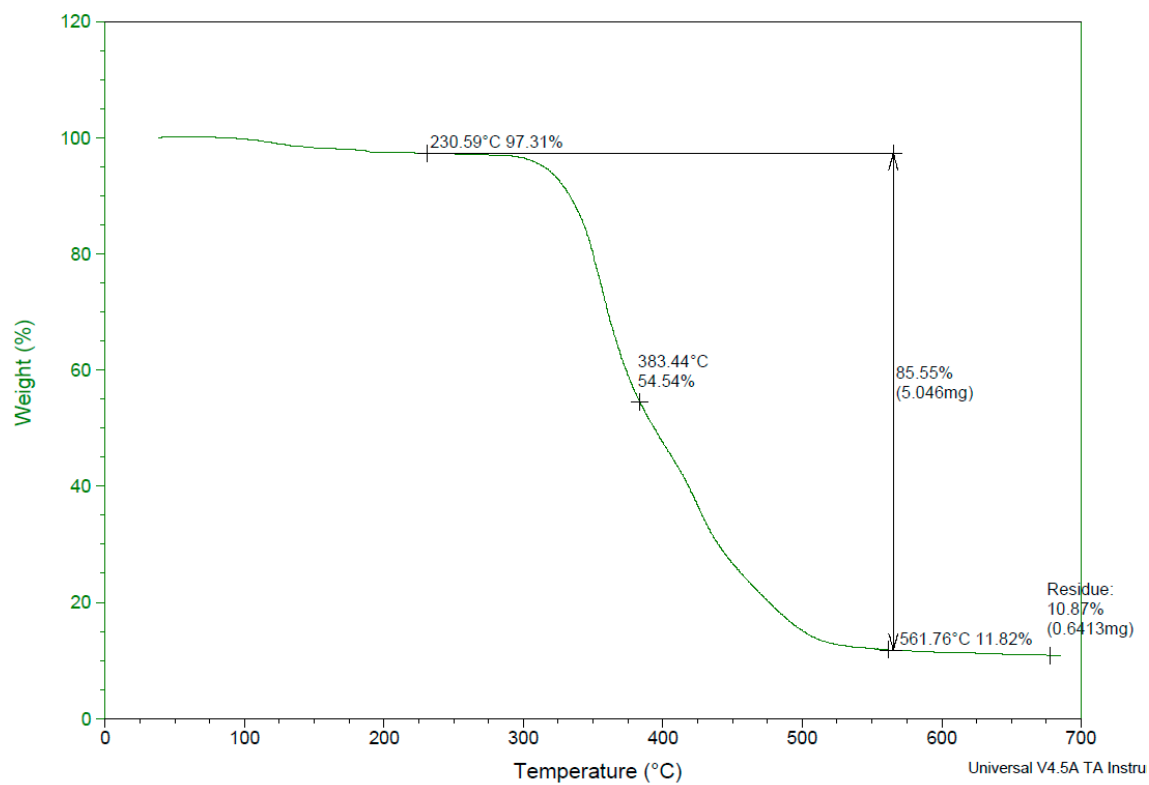



**Figure S23.**  $^1\text{H}$ -NMR spectrum of PHU **1e** in  $\text{DMSO-d}_6$ .

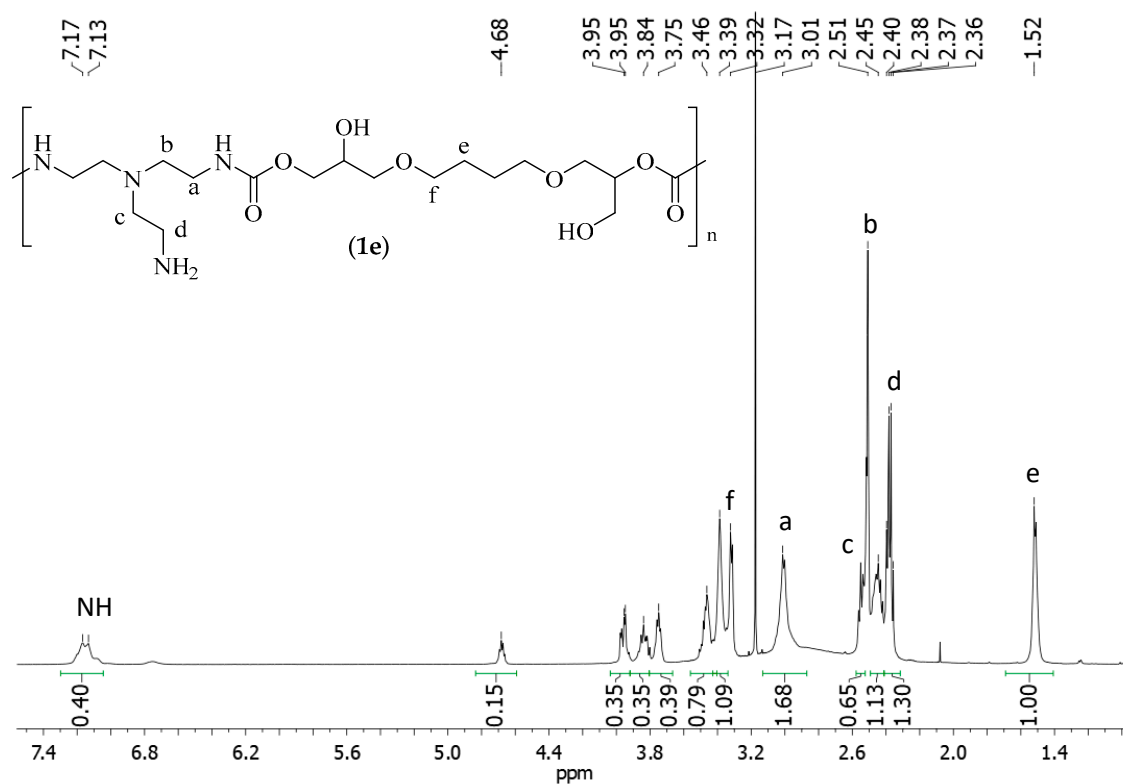

**Figure S24.**  $^{13}\text{C}$ - $\{^1\text{H}\}$ -NMR spectrum of PHU **1e** in  $\text{DMSO-d}_6$ .

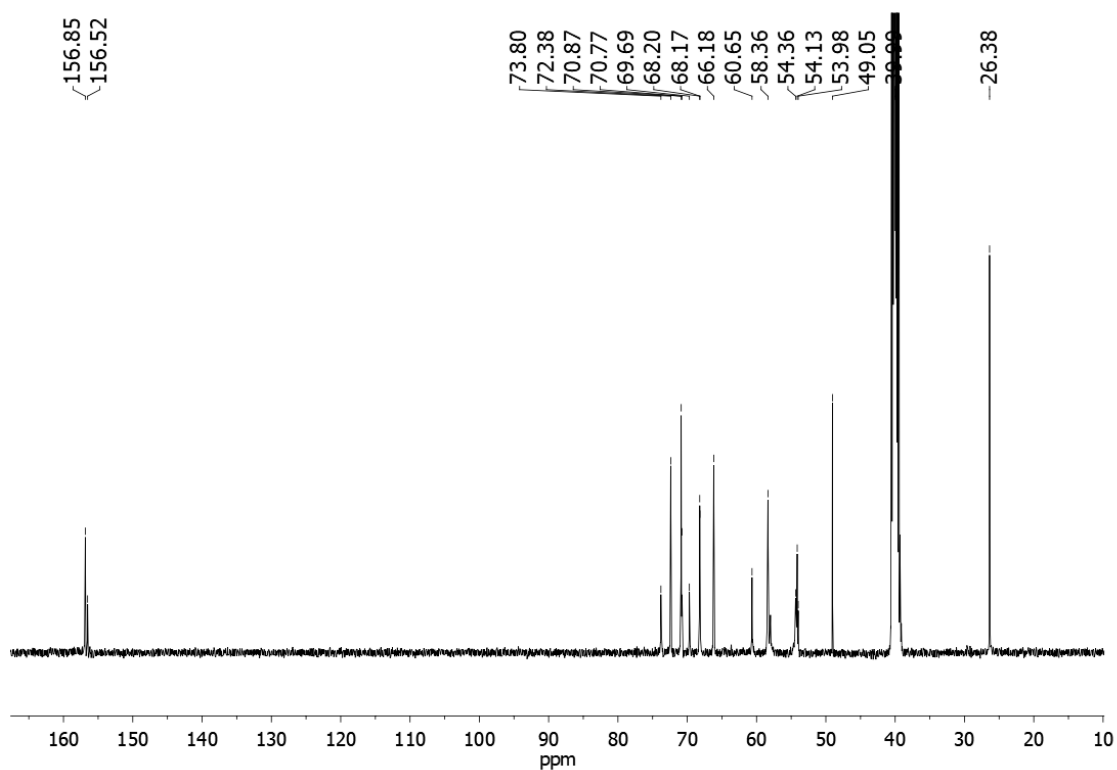

**Figure S25.** IR spectrum of PHU **1e**.

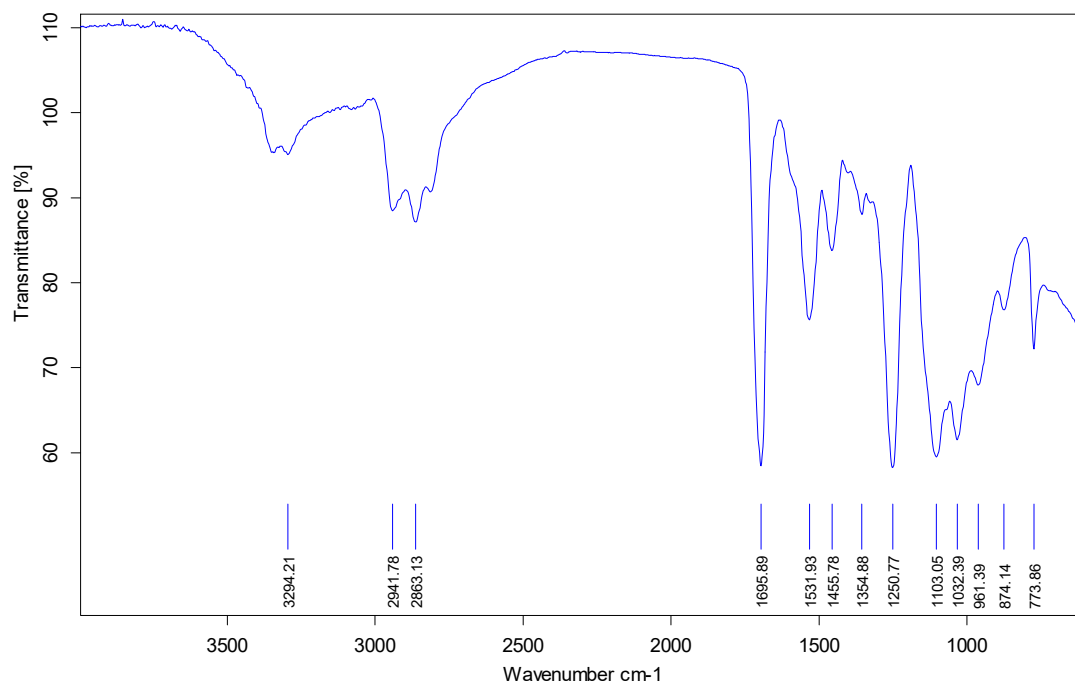

**Figure S26.** DSC thermogram of PHU **1e**.

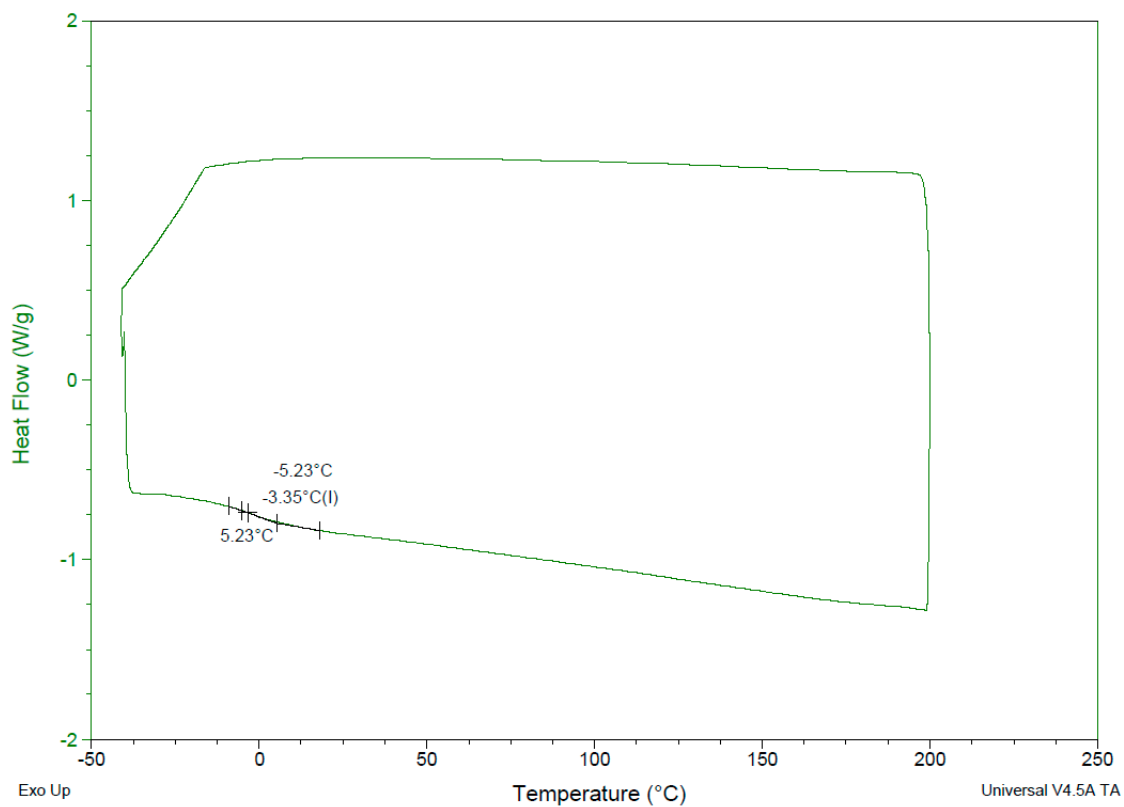

**Figure S27.** TGA thermogram of PHU **1e**.

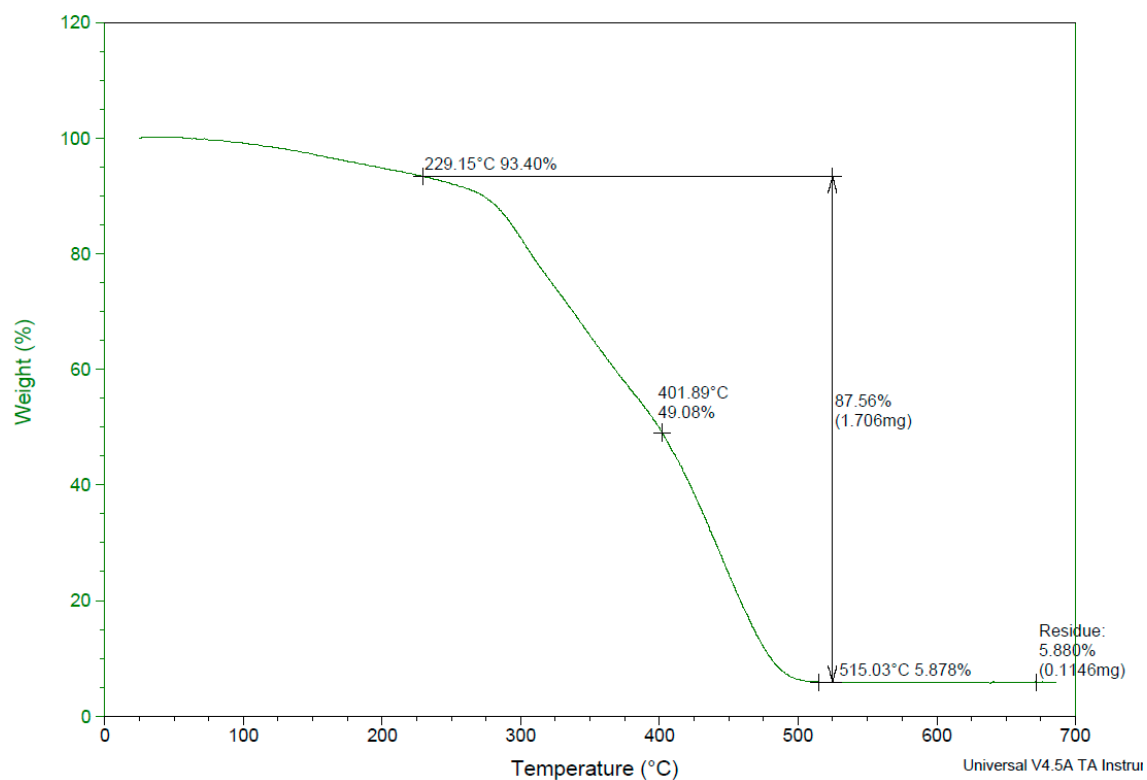

**Figure S28.** IR spectrum of PHU **1e** crosslinked (0.66 eq. tris-(aminoethyl)amine).

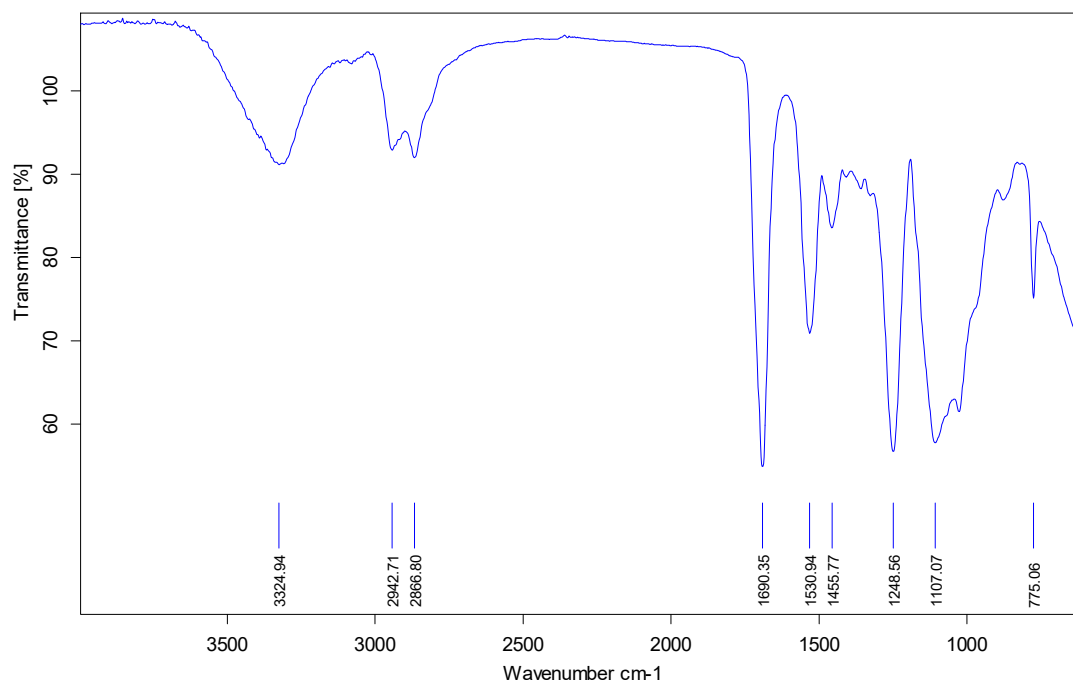

**Figure S29.** DSC thermogram of PHU **1e** crosslinked (0.66 eq. tris-(aminoethyl)amine).

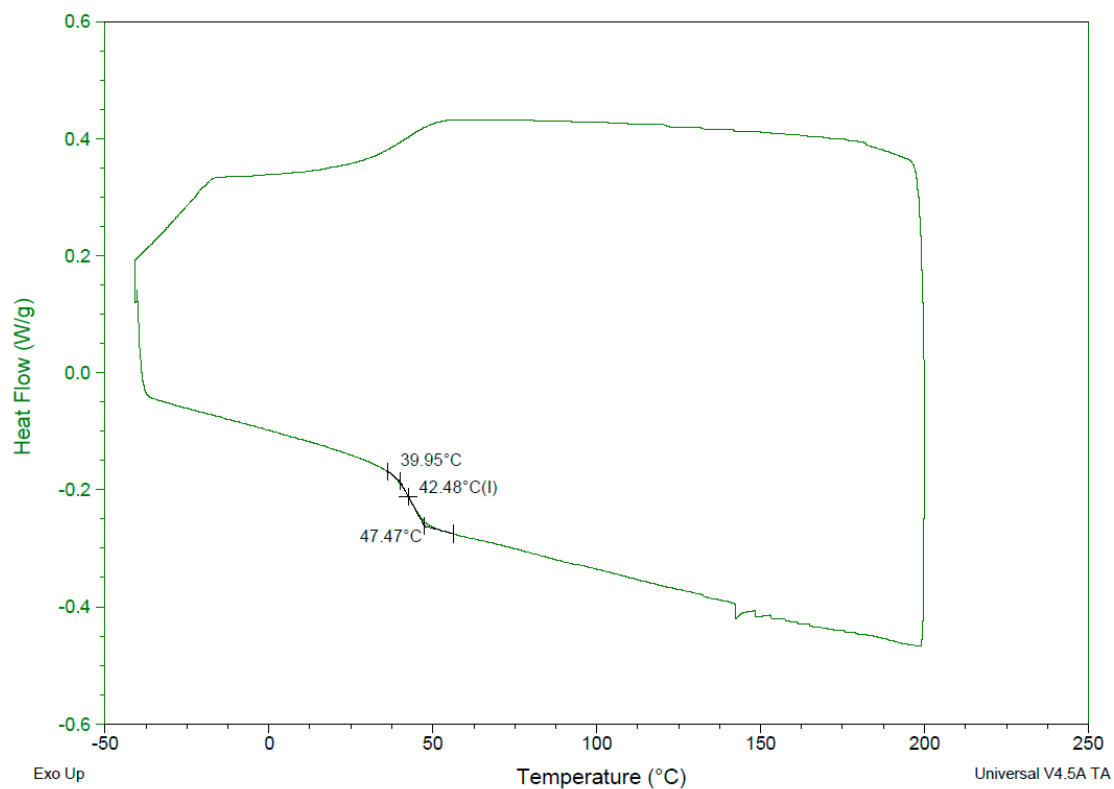

**Figure S30.** TGA thermogram of PHU **1e** crosslinked (0.66 eq. tris-(aminoethyl)amine).

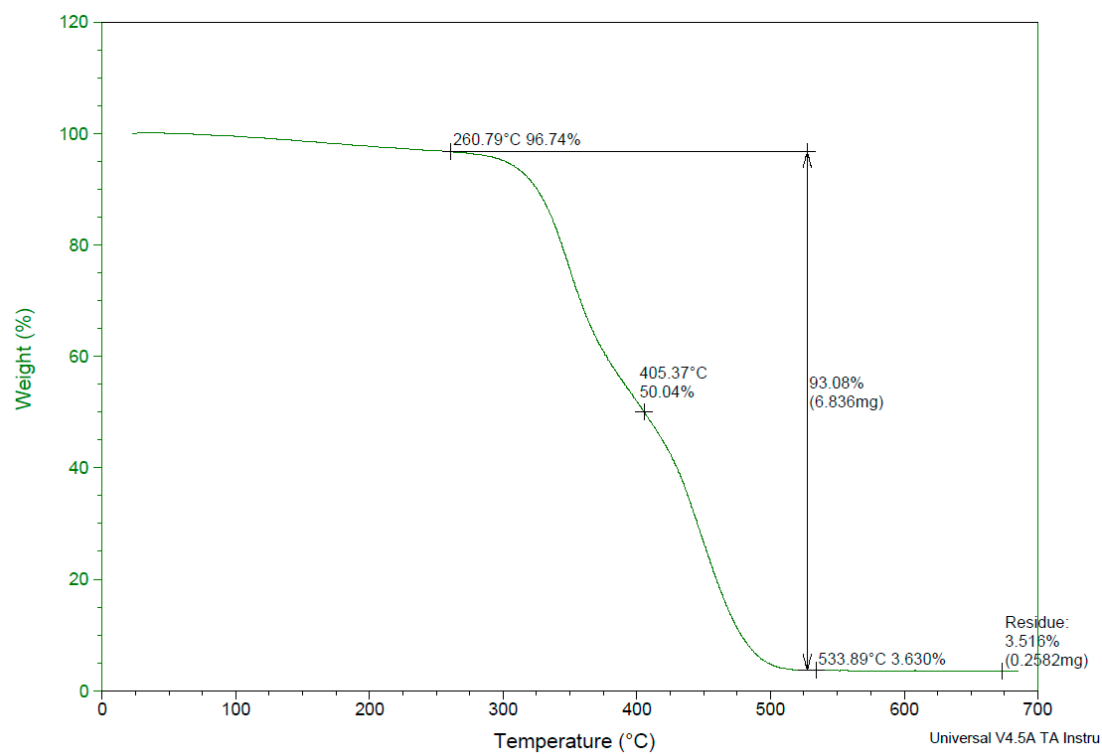

**Figure S31.**  $^1\text{H}$ -NMR spectrum of PHU **1f** in  $\text{DMSO-d}_6$ .

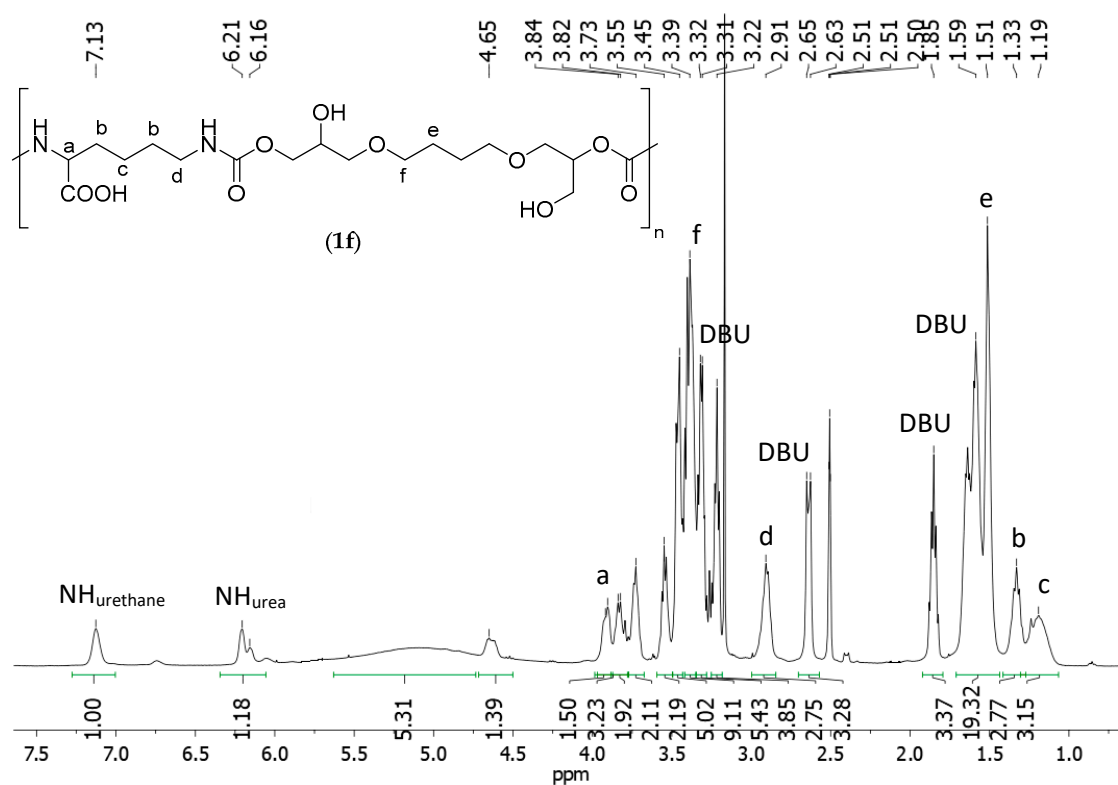

**Figure S32.**  $^{13}\text{C}$ - $\{^1\text{H}\}$ -NMR spectrum of PHU **1f** in  $\text{DMSO-d}_6$ .

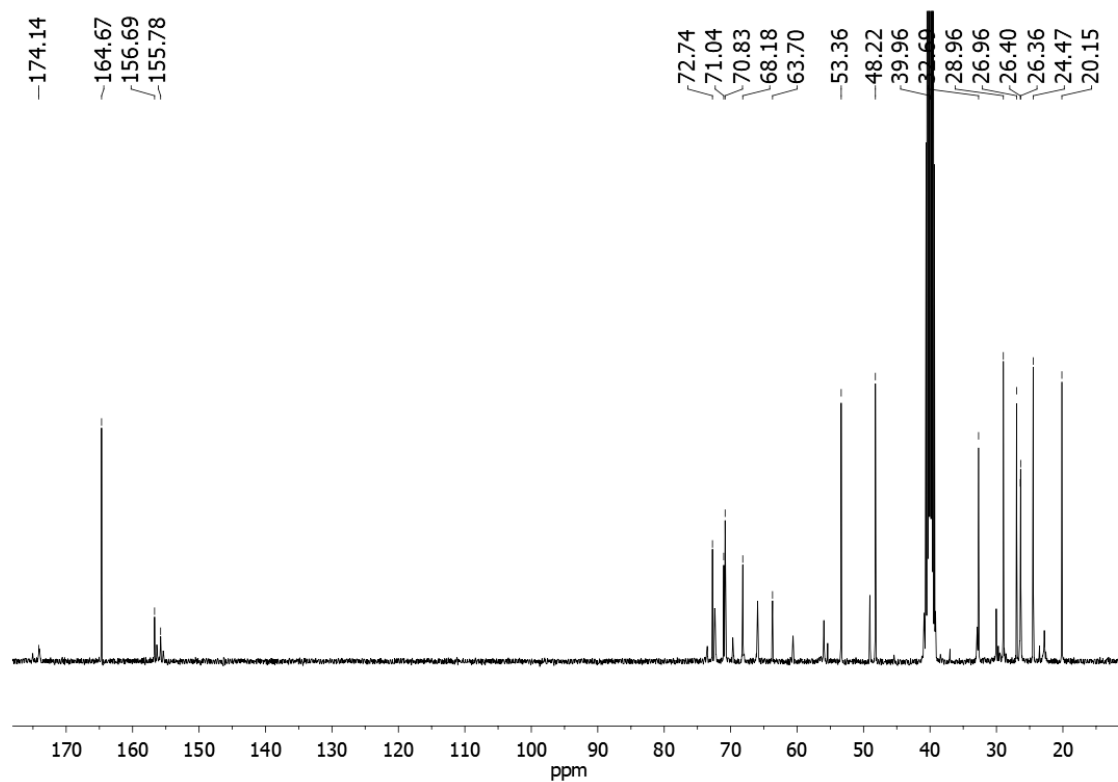

**Figure S33.** IR spectrum of PHU **1f**.

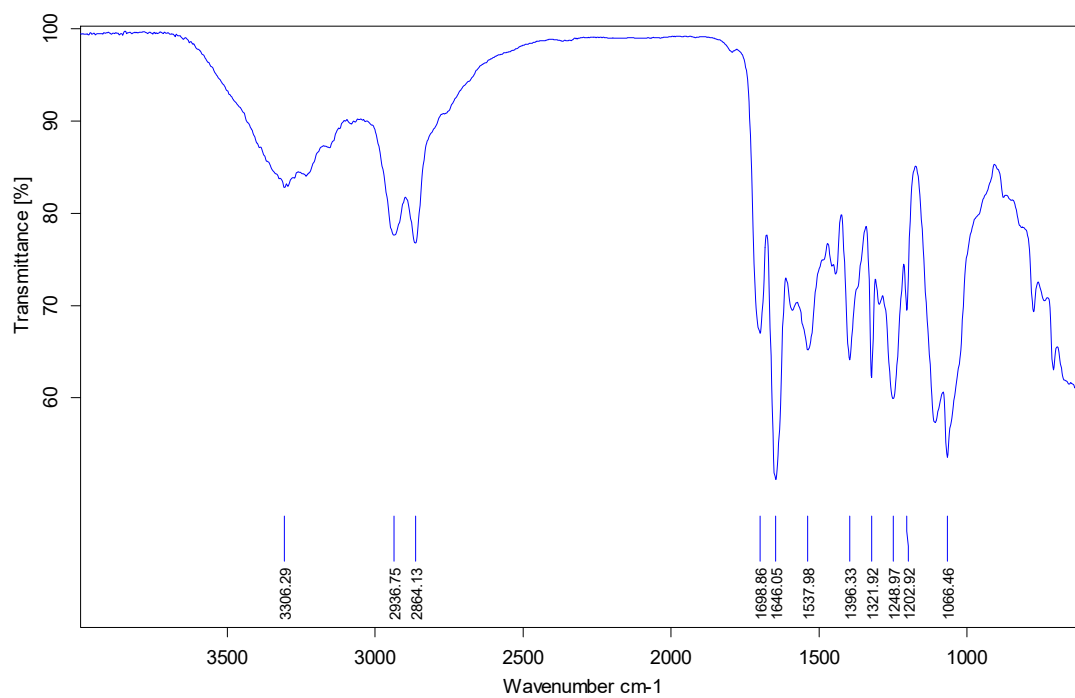

**Figure S34.** GPC trace of PHU **1f**.

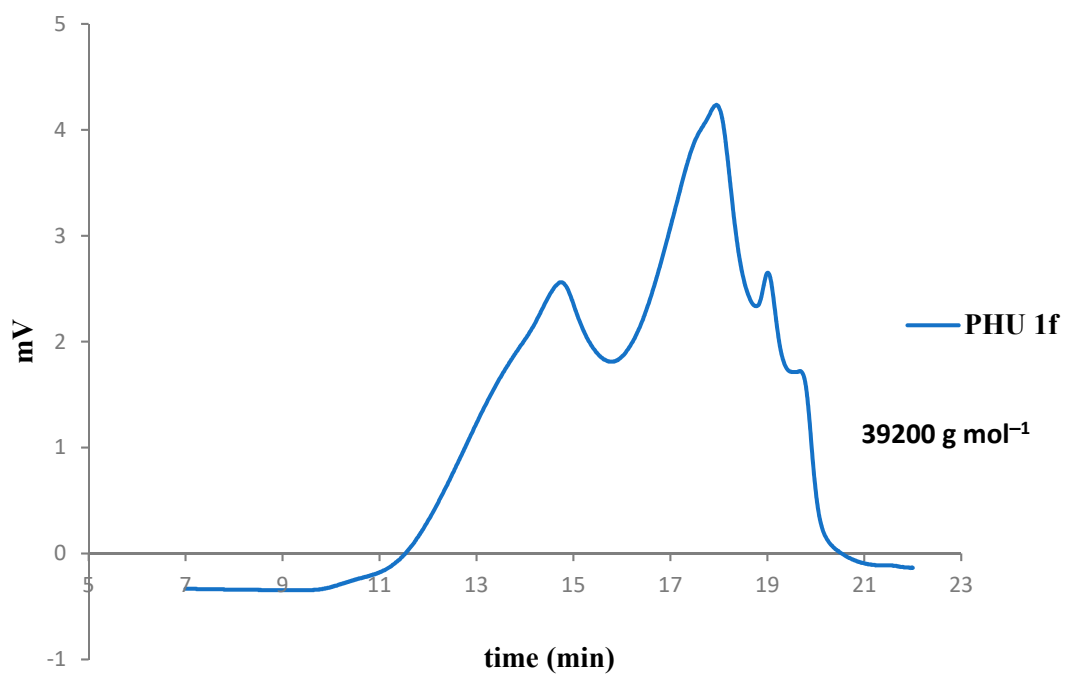

Figure S35. DOSY spectrum of PHU **1f**.

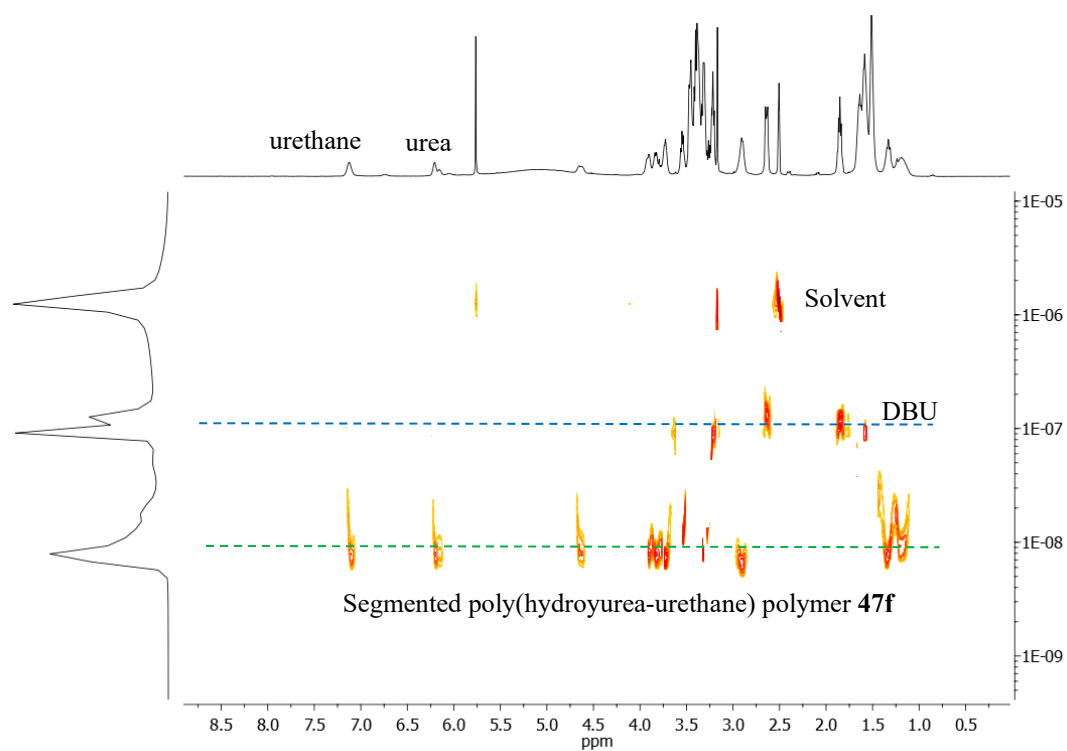

Figure S36. DSC thermogram of PHU **1f**.

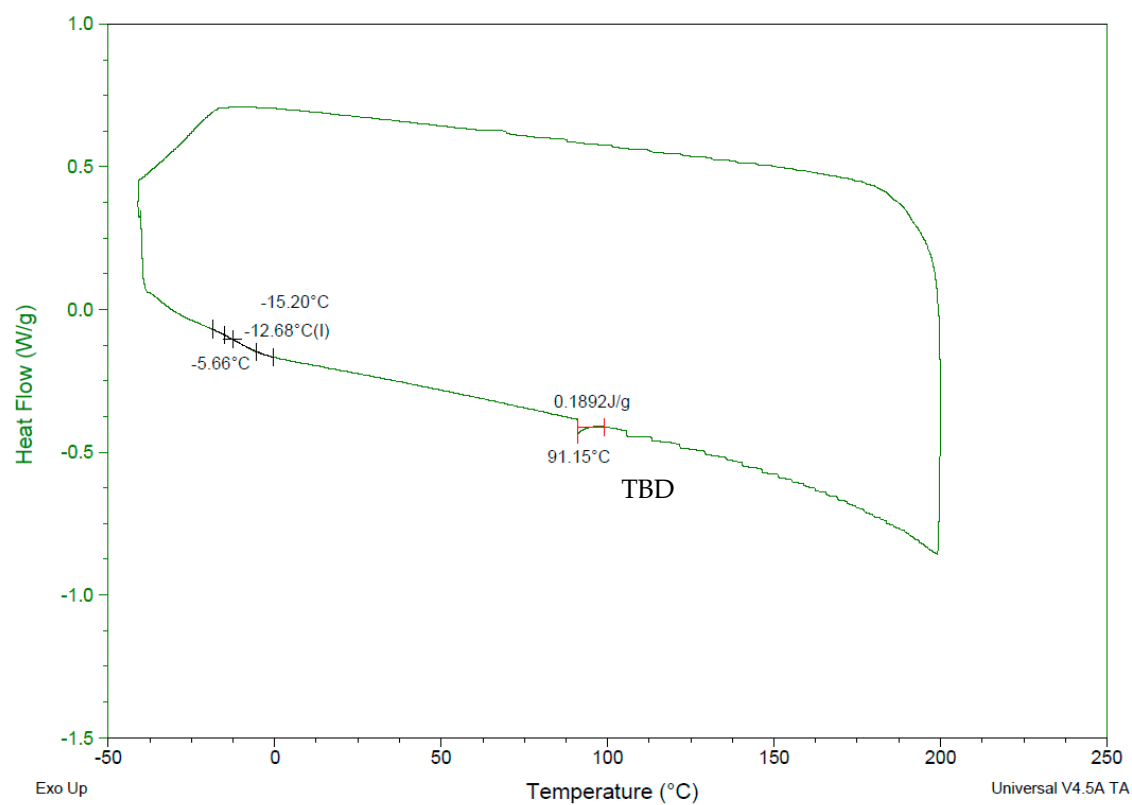

**Figure S37.** TGA thermogram of PHU **1f**.

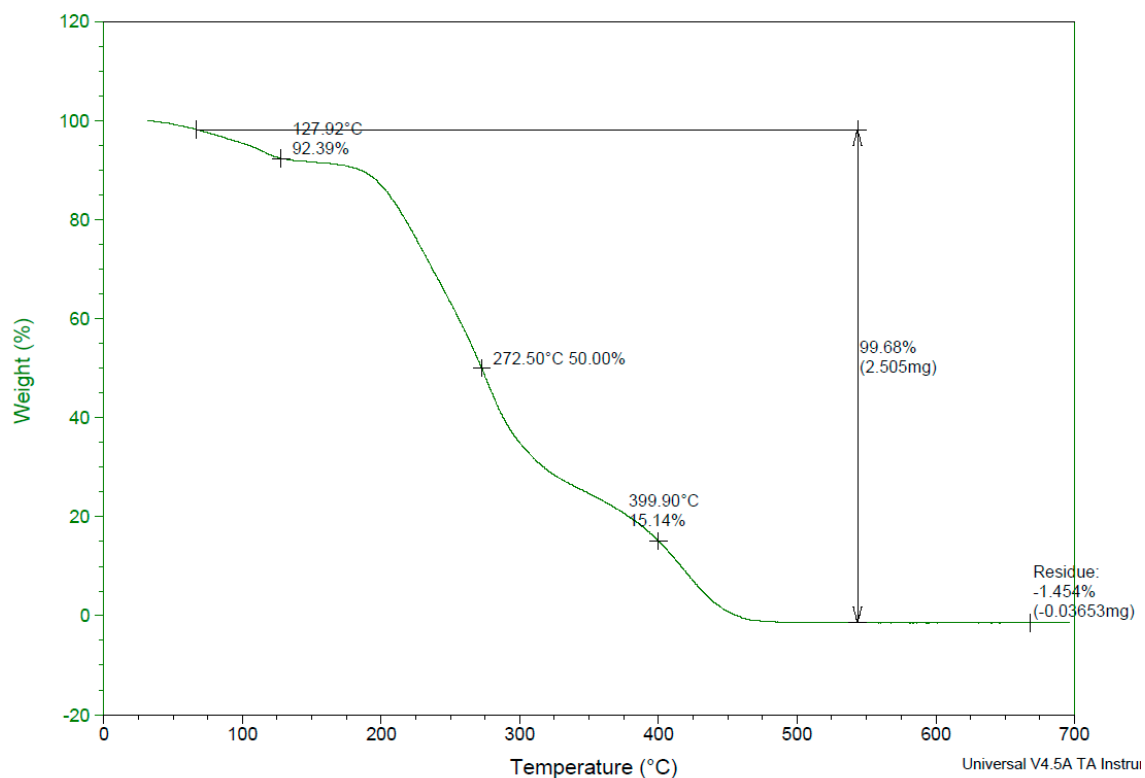

**Figure S38.**  $^1\text{H}$ -NMR spectrum of hydroxycarbamate **2** in  $\text{DMSO-d}_6$ .

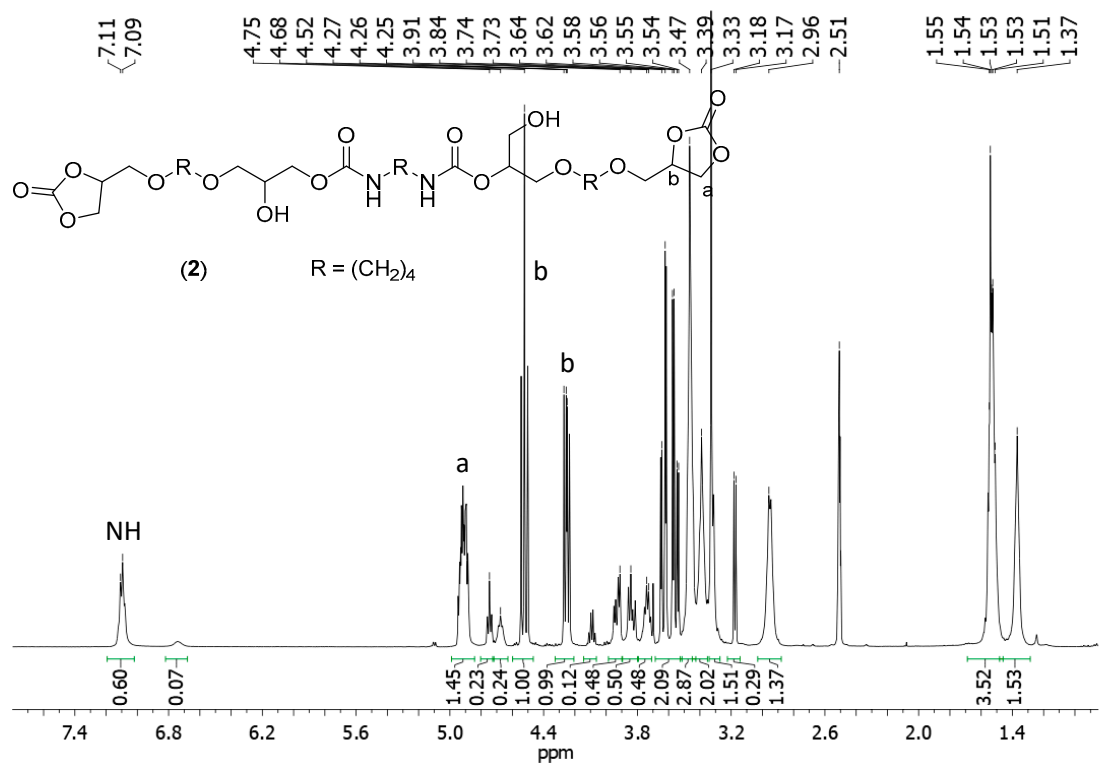



**Figure S39.**  $^{13}\text{C}$ - $\{^1\text{H}\}$ -NMR spectrum of hydroxycarbamate **2** in  $\text{DMSO-d}_6$ .

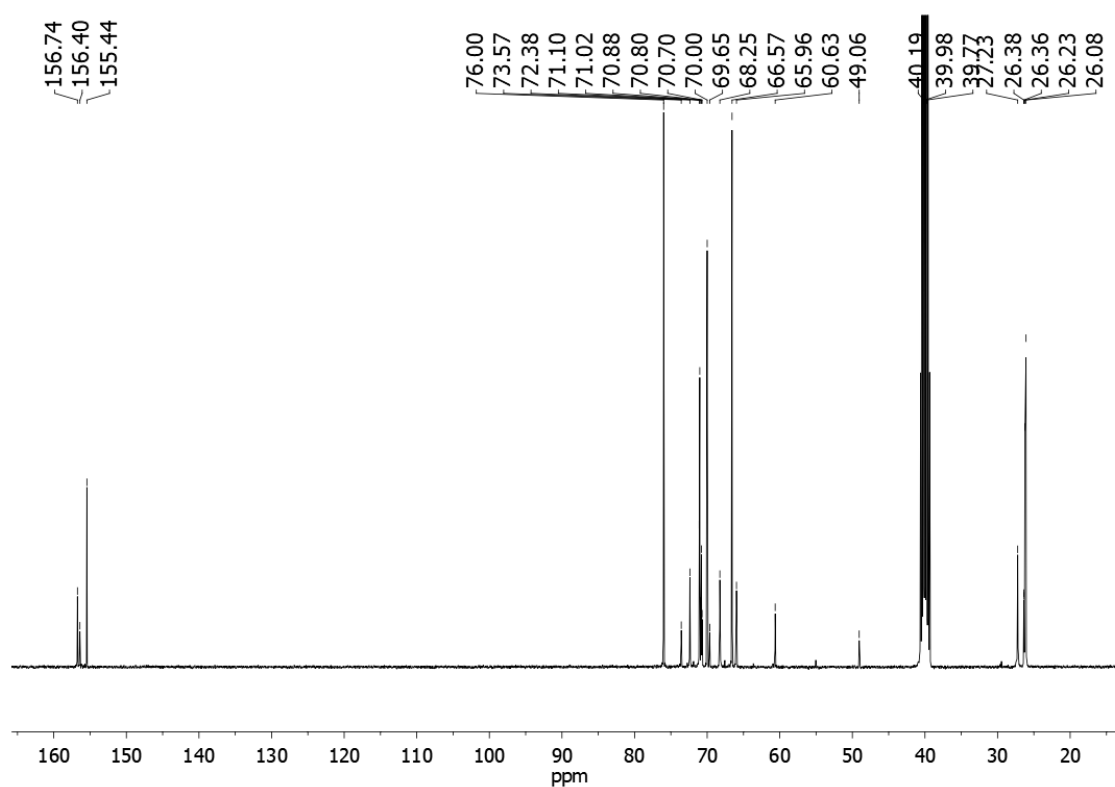

**Figure S40.** IR spectrum of hydroxycarbamate **2**.

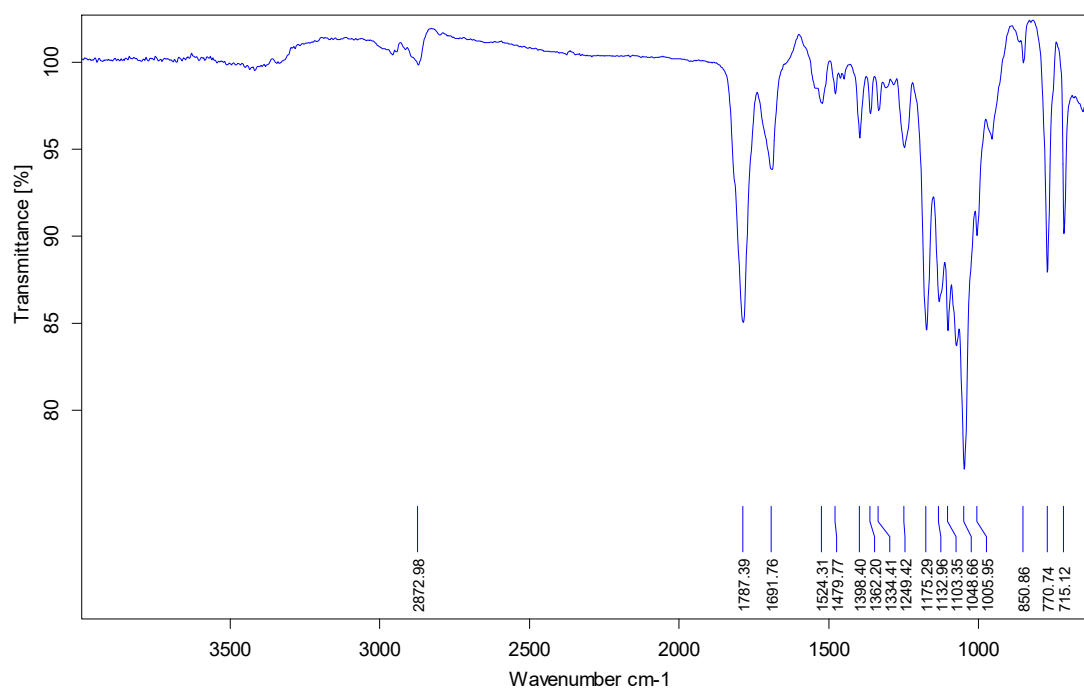

**Figure S41.** MALDI-ToF spectrum of hydroxycarbamate **2**.

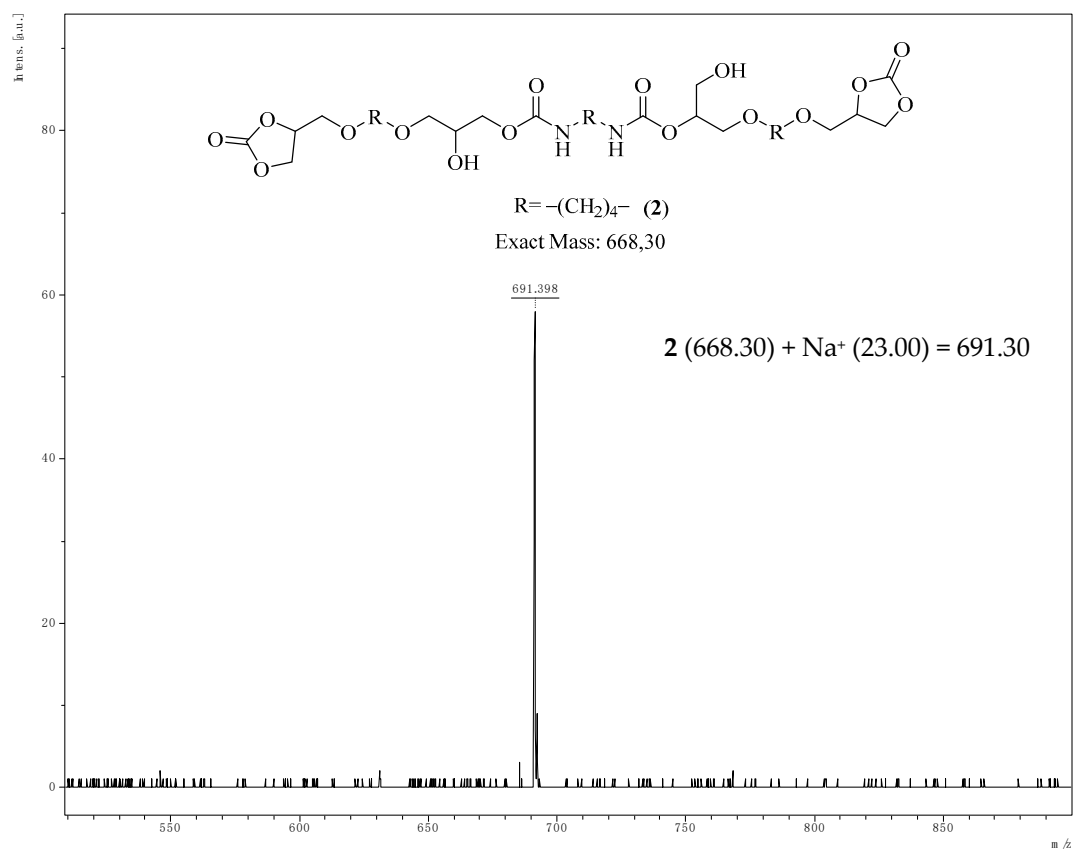

**Figure S42.**  $^1\text{H}$ -NMR spectrum of hydroxycarbamate **3** in  $\text{DMSO-d}_6$ .

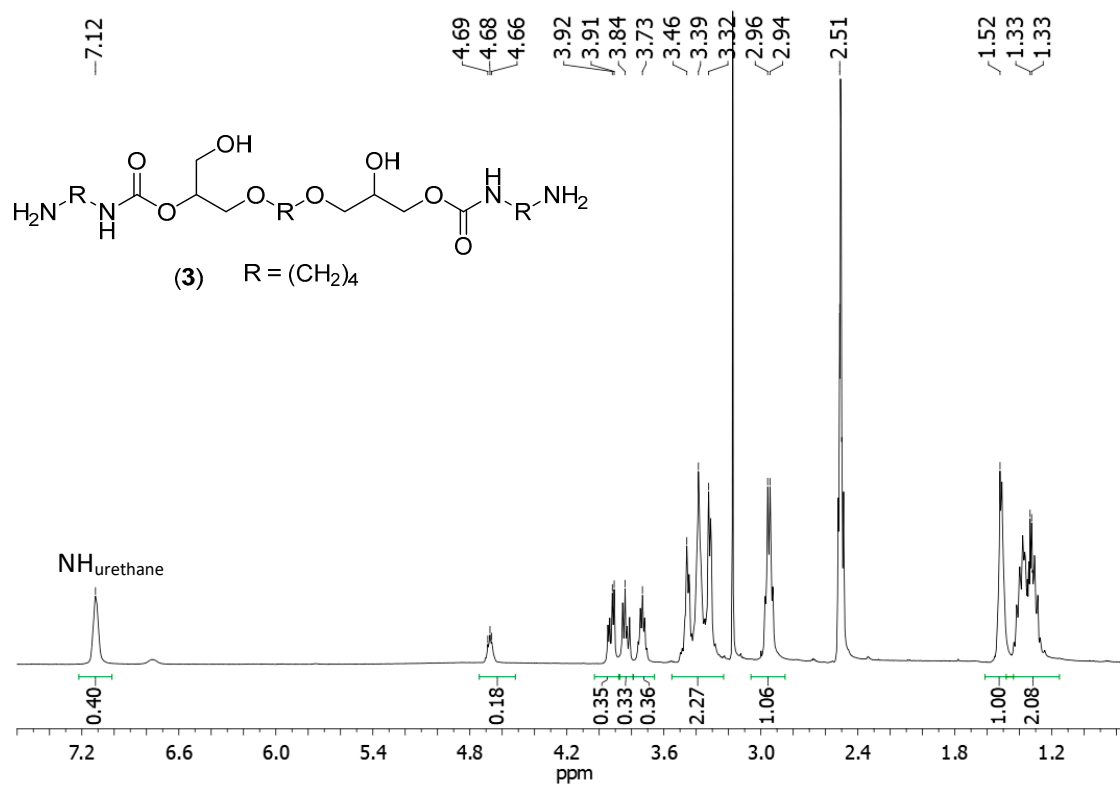

**Figure S43.**  $^{13}\text{C}$ - $\{^1\text{H}\}$ -NMR spectrum of hydroxycarbamate **3** in  $\text{DMSO-d}_6$ .

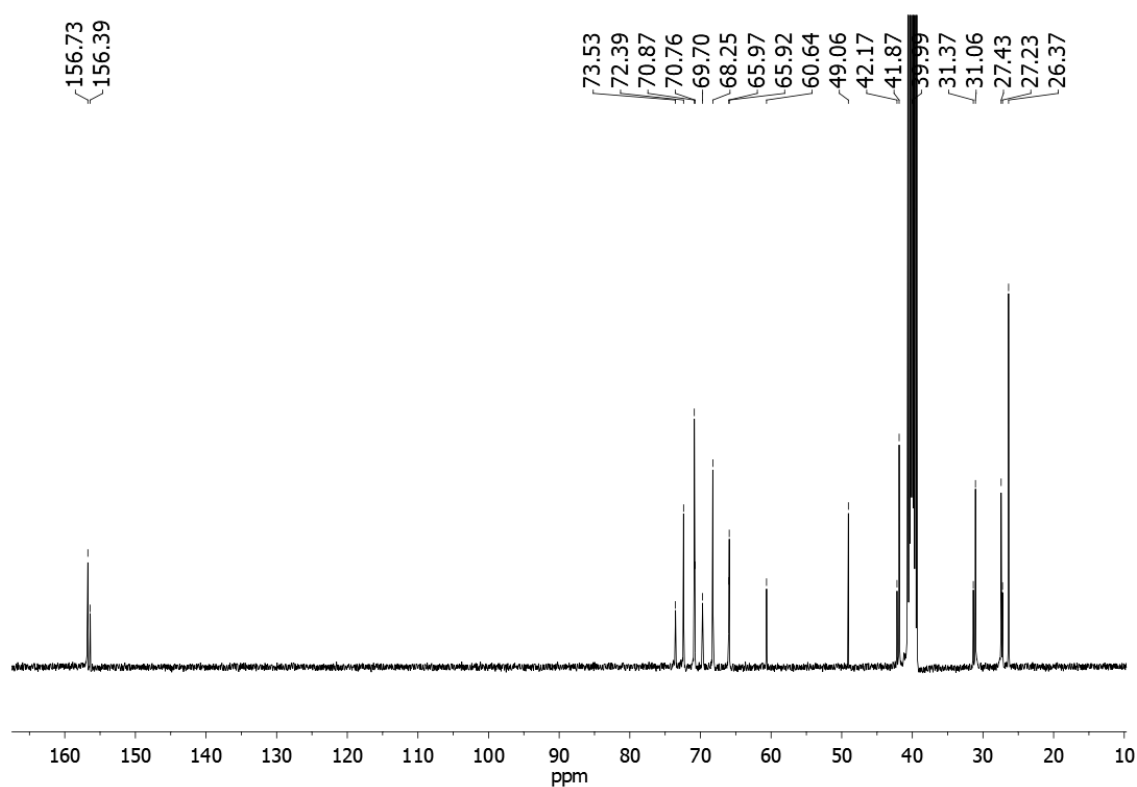

**Figure S44.** IR spectrum of hydroxycarbamate **3**.

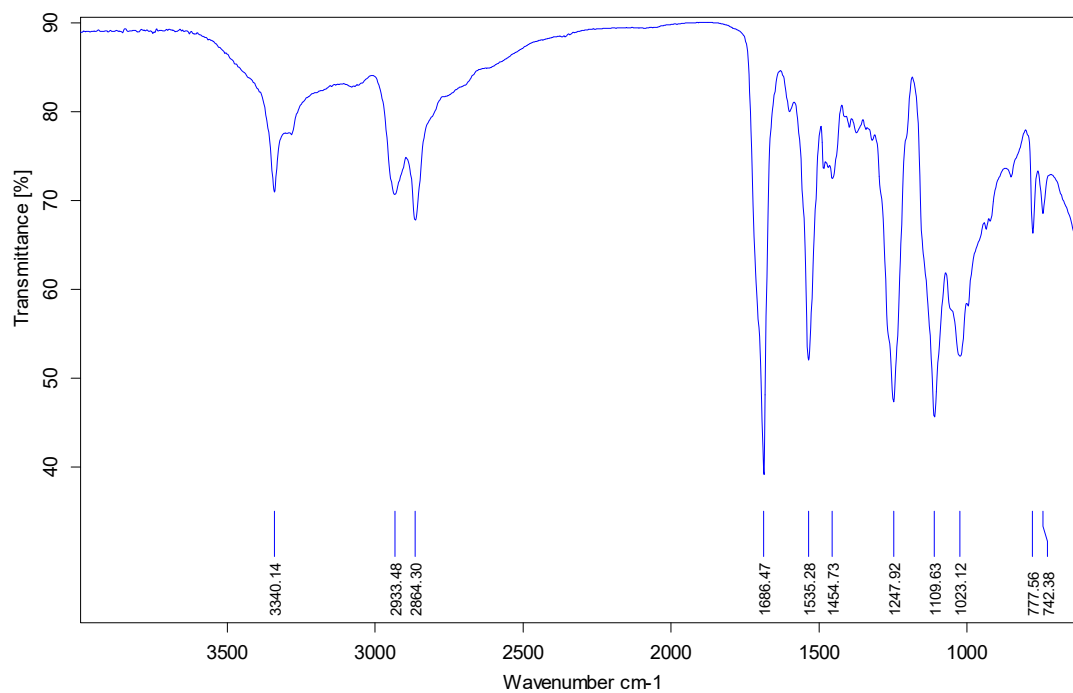

**Figure S45.** MALDI-ToF spectrum of hydroxycarbamate **3**.

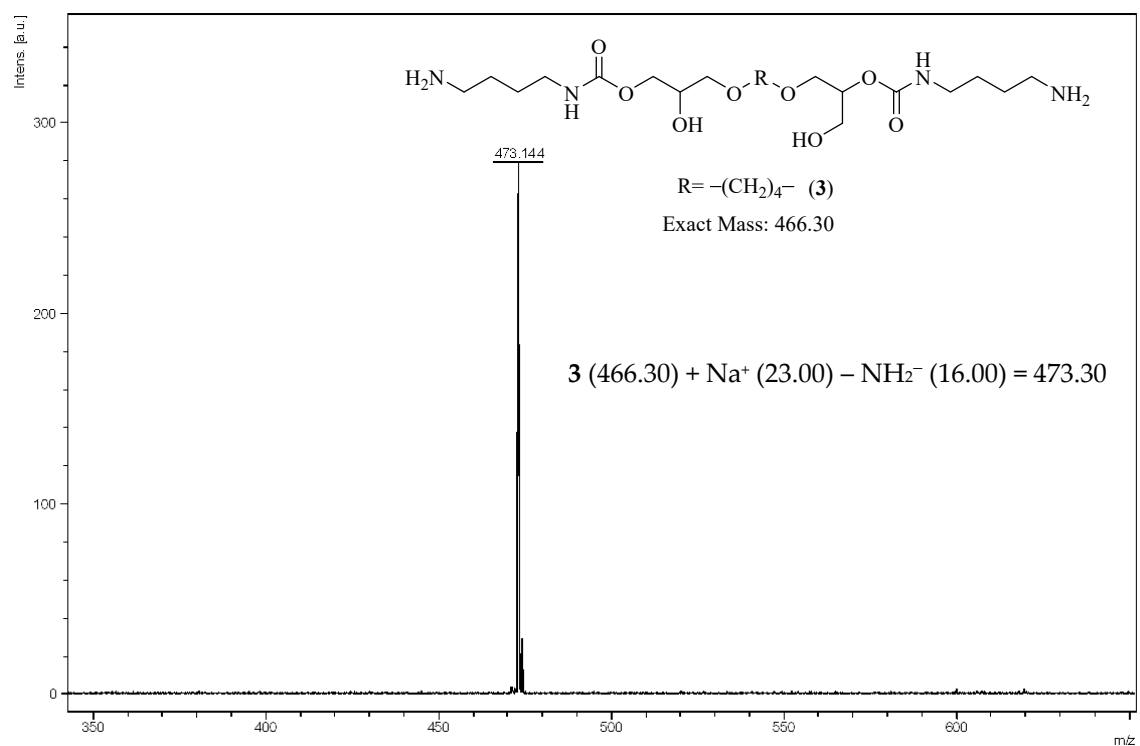

Supplement: s1 [file s1]
